# Supplementary material
Source: PubMed Central journal article supplement (PMC3092800)
Supplement: NIHMS260622-supplement-Supp_Appendix.pdf [file NIHMS260622-supplement-Supp_Appendix.pdf]

## Accounting for Data Errors Discovered from an Audit in Multiple Linear Regression

Supplementary Material

### *Confidence intervals using $\hat{\lambda}_2$ and $\hat{\lambda}_3$*

Construction of confidence intervals for  $\beta_1$  when using  $\hat{\lambda}_2$  is similar to that described in Section 2.1 for  $\hat{\lambda}_1$  except  $\theta = (\gamma_0, \gamma_1, \mu_w, \sigma_w^2, p, \sigma_u^2)$ , lines 3 and 4 of the estimating equations are  $(W_i - \mu_w)$  and  $((W_i - \mu_w)^2 - \sigma_w^2)$  respectively, and

$$\frac{\partial g(\theta)}{\partial \theta} = \left( 0, \frac{\sigma_w^2}{\sigma_w^2 - \sigma_u^2 p}, 0, -\frac{\gamma_1 \sigma_u^2 p}{(\sigma_w^2 - \sigma_u^2 p)^2}, \frac{\gamma_1 \sigma_w^2 \sigma_u^2}{(\sigma_w^2 - \sigma_u^2 p)^2}, \frac{\gamma_1 \sigma_w^2 p}{(\sigma_w^2 - \sigma_u^2 p)^2} \right).$$

Constructing confidence intervals for  $\beta_1$  when using  $\hat{\lambda}_3$  is also similar to that described in Section 2.1 for  $\hat{\lambda}_1$  except  $\theta = (\gamma_0, \gamma_1, \mu_x, \sigma_x^2, \sigma_t^2)$ , lines 5 and 6 of the estimating equations are replaced with the single line  $(T_i^2 - \sigma_t^2)V_i$ , and

$$\frac{\partial g(\theta)}{\partial \theta} = \left( 0, \frac{\sigma_x^2 + \sigma_t^2}{\sigma_x^2}, 0, -\frac{\gamma_1 \sigma_t^2}{(\sigma_x^2)^2}, \frac{\gamma_1}{\sigma_x^2} \right).$$

### *Bias when outcome and predictor are sometimes incorrect in the database*

Under models (1), (2), and (5), and the assumptions given in Section 2.3,  $\gamma_1$  in the model  $E(Y^*|W) = \gamma_0 + \gamma_1 W$  is equal to the following:

$$\begin{aligned} \gamma_1 &= \frac{Cov(Y^*, W)}{Var(W)} \\ &= \frac{Cov(X + SU, Y + S^y U^y + SU^*)}{\sigma_x^2 + p\sigma_u^2} \\ &= \frac{Cov(X, Y) + Cov(SU, SU^*)}{\sigma_x^2 + p\sigma_u^2} \\ &= \frac{Cov(X, Y)}{\sigma_x^2} \frac{\sigma_x^2}{\sigma_x^2 + p\sigma_u^2} + \frac{E_S \{ E_{U|S} [(SU - E(SU))(SU^* - E(SU^*))] \}}{\sigma_x^2 + p\sigma_u^2} \\ &= \beta_1 \frac{\sigma_x^2}{\sigma_x^2 + p\sigma_u^2} + \frac{E_S \{ S^2 Cov(U, U^*) \}}{\sigma_x^2 + p\sigma_u^2} \\ &= \beta_1 \frac{\sigma_x^2}{\sigma_x^2 + p\sigma_u^2} + \frac{p\sigma_{u,u^*}}{\sigma_x^2 + p\sigma_u^2} \\ &= \beta_1 \lambda + \nu. \end{aligned}$$

### *Second Audit Size Selection for Data Example*

After the first set of audits, we performed simulations using estimated parameters in order to decide whether to perform additional audits to improve estimates and if yes, how many. Simulations were similar to those described in Section 3 of the manuscript except data were generated using estimated parameters 1) computed separately for each site, and 2) computed by combining first audit results from all sites. For each site we performed simulations using the estimated error rate and the upper and lower levels of the 80% confidence intervals around the error rate. We simulated using multiple values for the correlation  $\rho_{u,u^*}$ . We considered audit sizes of 0, 25, 50, 75, 100, and  $N_z$  where  $N_z$  represents the total number of patients in the site.

Table 25 summarizes our simulation results. Site-specific parameter estimates for all sites except Site C suggested no additional audits were needed based on mean squared errors that remained nearly constant when more records were audited. This result is due to low error rates ( $p$ ), low error magnitudes ( $\sigma_u$ ), and/or low correlation between errors ( $\rho_{u,u^*}$ ) in the first audit. Using site-specific estimates from Site C, even with 100 audits, the MSE was much larger than if data were re-entered for all records. However, these site specific parameter estimates were based on a relatively small number of audits and Site C's were driven by a single extreme value. The simulations using the combined-site parameter estimates for  $\sigma_u$  and  $\rho_{u,u^*}$  were still influenced by the outlier, but to a lesser extent because there was more data. We felt that these simulations using the combined-site parameter estimates could represent worst-case scenarios for all sites except Site C and perhaps a more realistic situation for Site C.

The MSE exponentially decreases as the audit size increases. Ideally, we would like to choose an audit size where the slope of the curve is as close to 0 as possible and below the MSE of the naive estimate. For example, Site C's MSE using across-site parameter estimates dropped below the naive estimate's MSE with an audit size of 50, and continued dropping at a slower rate until it reached the MSE if all data were audited. In contrast, Site D's MSE using across-site parameter estimates dropped below the naive estimate's MSE with an audit size of 100. However, the slope of the MSE curve appeared to be fairly level after 50 audits, implying that there was not much to be gained in terms of MSE by auditing many additional records beyond 50. These sorts of observations as well as practical feasibility guided our audit size considerations. It should also be noted that these simulations were based on parameter estimates using non-transformed CD4 measurements.

Based on feasibility and the high error rate and magnitude in the first set of audits, we chose to aim for 75 total audits in Site C. For most of the other sites, with the combined, worst-case scenario parameter estimates, the MSE was roughly similar to the naive estimate at 50 audited charts. As Sites B and E had higher error rates, we chose to perform 25-30 additional audits at these sites, bringing our total to around 50 at each. Site F had no errors in 25 initial chart reviews, so we felt comfortable performing no additional audits for this site. Sites A and D had identical low error rates in the

first audit and we felt it would be best to perform additional audits for both, but also reasonable not to perform additional audits (particularly because the results shown in Table 25 for across-site parameter estimates represent what we considered worst-case scenarios for these sites). In the end, we chose not to perform audits in Site D because of recent personnel turnover at that site, but we performed additional audits in Site A because we had an approaching site-visit.

### *Code Used for Analyses and Simulations*

The R code used for the analyses and simulations in this manuscript is posted at <http://biostat.mc.vanderbilt.edu/DataAuditSimulationCode>.

### *Tables in Supplementary Appendix*

| Table | Simulation Scenario                                         | $N$  | $\sigma_u$ | $\rho_{u,u^*}$ |
|-------|-------------------------------------------------------------|------|------------|----------------|
| 1     | Errors in Predictor                                         | 1000 | 50         |                |
| 2     | Errors in Predictor                                         | 1000 | 20         |                |
| 3     | Errors in Predictor                                         | 500  | 50         |                |
| 4     | Errors in Predictor                                         | 500  | 20         |                |
| 5     | Errors in Predictor                                         | 100  | 50         |                |
| 6     | Errors in Predictor                                         | 100  | 20         |                |
| 7     | Errors in Predictor and Outcome                             | 1000 | 50         | -0.5, 0, 0.5   |
| 8     | Errors in Predictor and Outcome                             | 1000 | 20         | -0.5, 0, 0.5   |
| 9     | Errors in Predictor and Outcome                             | 500  | 50         | -0.5, 0, 0.5   |
| 10    | Errors in Predictor and Outcome                             | 500  | 20         | -0.5, 0, 0.5   |
| 11    | Errors in Predictor and Outcome                             | 100  | 50         | -0.5, 0, 0.5   |
| 12    | Errors in Predictor and Outcome                             | 100  | 20         | -0.5, 0, 0.5   |
| 13    | Errors in Predictor and Outcome with Covariate              | 1000 | 50         | -0.5           |
| 14    | Errors in Predictor and Outcome with Covariate              | 1000 | 50         | 0              |
| 15    | Errors in Predictor and Outcome with Covariate              | 1000 | 50         | 0.5            |
| 16    | Errors in Predictor and Outcome with Covariate              | 1000 | 20         | -0.5           |
| 17    | Errors in Predictor and Outcome with Covariate              | 1000 | 20         | 0              |
| 18    | Errors in Predictor and Outcome with Covariate              | 1000 | 20         | 0.5            |
| 19    | Errors in Predictor and Outcome with Covariate              | 500  | 50         | -0.5           |
| 20    | Errors in Predictor and Outcome with Covariate              | 500  | 50         | 0              |
| 21    | Errors in Predictor and Outcome with Covariate              | 500  | 50         | 0.5            |
| 22    | Errors in Predictor and Outcome with Covariate              | 500  | 20         | -0.5           |
| 23    | Errors in Predictor and Outcome with Covariate              | 500  | 20         | 0              |
| 24    | Errors in Predictor and Outcome with Covariate              | 500  | 20         | 0.5            |
| 25    | Site-specific Simulations to determine Size of Second Audit |      |            |                |

Table 1: Simulation Results when Predictor is Sometimes Incorrect ( $N=1000, \sigma_u = 50$ )

| $p$  | $n_v$ | $\lambda_1$         |                   |                   |                   |                  | $\lambda_2$      |                   |                   |                  |                  | $\lambda_3$       |                   |                  |                  |                   |                   |  |
|------|-------|---------------------|-------------------|-------------------|-------------------|------------------|------------------|-------------------|-------------------|------------------|------------------|-------------------|-------------------|------------------|------------------|-------------------|-------------------|--|
|      |       | %-Bias <sup>a</sup> | $\overline{SE}^b$ | Coverage          | MSE               | %-Bias           | $\overline{SE}$  | Coverage          | MSE               | %-Bias           | $\overline{SE}$  | Coverage          | MSE               | %-Bias           | $\overline{SE}$  | Coverage          | MSE               |  |
|      |       | ( $\times 100$ )    | ( $\times 100$ )  | ( $\times 10^7$ ) | ( $\times 10^7$ ) | ( $\times 100$ ) | ( $\times 100$ ) | ( $\times 10^7$ ) | ( $\times 10^7$ ) | ( $\times 100$ ) | ( $\times 100$ ) | ( $\times 10^7$ ) | ( $\times 10^7$ ) | ( $\times 100$ ) | ( $\times 100$ ) | ( $\times 10^7$ ) | ( $\times 10^7$ ) |  |
| 0.05 | 0     | -4.78               | 0.032             | 0.663             | 3.4               | 0.38             | 0.066            | 0.847             | 10                | 3.1              | 1.058            | 0.849             | 1872.7            | 0.06             | 0.068            | 0.834             | 26.9              |  |
|      | 25    |                     |                   |                   |                   | 0.26             | 0.056            | 0.898             | 5.1               | 0.52             | 0.061            | 0.9               | 6.9               | 0.09             | 0.056            | 0.901             | 6.7               |  |
|      | 50    |                     |                   |                   |                   | 0.13             | 0.047            | 0.934             | 2.6               | 0.2              | 0.049            | 0.938             | 2.8               | 0.13             | 0.047            | 0.943             | 2.5               |  |
|      | 100   |                     |                   |                   |                   | -0.03            | 0.04             | 0.947             | 1.6               | 0                | 0.041            | 0.948             | 1.7               | -0.01            | 0.04             | 0.951             | 1.6               |  |
|      | 200   |                     |                   |                   |                   | -0.03            | 0.037            | 0.953             | 1.4               | -0.02            | 0.038            | 0.954             | 1.4               | -0.02            | 0.037            | 0.954             | 1.4               |  |
|      | 300   |                     |                   |                   |                   |                  |                  |                   |                   |                  |                  |                   |                   |                  |                  |                   |                   |  |
| 0.1  | 0     |                     |                   |                   |                   |                  |                  |                   |                   |                  |                  |                   |                   |                  |                  |                   |                   |  |
|      | 25    | -9.03               | 0.032             | 0.206             | 9.4               | 0.71             | 0.09             | 0.766             | 17.6              | 0.75             | 0.674            | 0.765             | 1031.6            | 0.83             | 0.091            | 0.762             | 31.4              |  |
|      | 50    |                     |                   |                   |                   | 0.31             | 0.071            | 0.873             | 7.4               | 0.67             | 0.08             | 0.869             | 9.4               | 0.3              | 0.071            | 0.878             | 7.6               |  |
|      | 100   |                     |                   |                   |                   | 0.23             | 0.057            | 0.926             | 3.8               | 0.39             | 0.062            | 0.924             | 4.5               | 0.23             | 0.057            | 0.93              | 3.6               |  |
|      | 200   |                     |                   |                   |                   | 0.08             | 0.046            | 0.94              | 2.3               | 0.15             | 0.049            | 0.944             | 2.6               | 0.08             | 0.046            | 0.942             | 2.3               |  |
|      | 300   |                     |                   |                   |                   | 0.06             | 0.042            | 0.944             | 1.9               | 0.1              | 0.043            | 0.945             | 2                 | 0.06             | 0.042            | 0.946             | 1.9               |  |
| 0.2  | 0     |                     |                   |                   |                   |                  |                  |                   |                   |                  |                  |                   |                   |                  |                  |                   |                   |  |
|      | 25    | -16.66              | 0.031             | 0.001             | 28.9              | 1.43             | 0.126            | 0.798             | 30.1              | 4.85             | 0.577            | 0.77              | 737.3             | 1.43             | 0.125            | 0.801             | 27.7              |  |
|      | 50    |                     |                   |                   |                   | 0.64             | 0.094            | 0.88              | 11.3              | 1.42             | 0.116            | 0.867             | 17.8              | 0.63             | 0.094            | 0.886             | 10.6              |  |
|      | 100   |                     |                   |                   |                   | 0.28             | 0.072            | 0.928             | 5.7               | 0.63             | 0.082            | 0.928             | 7.6               | 0.27             | 0.072            | 0.929             | 5.5               |  |
|      | 200   |                     |                   |                   |                   | 0.1              | 0.055            | 0.944             | 3.2               | 0.26             | 0.061            | 0.947             | 3.9               | 0.09             | 0.055            | 0.944             | 3.1               |  |
|      | 300   |                     |                   |                   |                   | 0.03             | 0.048            | 0.946             | 2.4               | 0.13             | 0.052            | 0.948             | 2.8               | 0.03             | 0.048            | 0.946             | 2.4               |  |
| 0.3  | 0     |                     |                   |                   |                   |                  |                  |                   |                   |                  |                  |                   |                   |                  |                  |                   |                   |  |
|      | 25    | -23.09              | 0.031             | 0                 | 54.5              | 2.59             | 0.151            | 0.839             | 36.8              | -7.18            | 41.946           | 0.803             | 77951.9           | 2.58             | 0.151            | 0.844             | 34.1              |  |
|      | 50    |                     |                   |                   |                   | 1.14             | 0.11             | 0.895             | 15.5              | 2.22             | 0.145            | 0.877             | 29.6              | 1.13             | 0.11             | 0.899             | 15                |  |
|      | 100   |                     |                   |                   |                   | 0.53             | 0.081            | 0.927             | 7.2               | 0.96             | 0.098            | 0.921             | 10.8              | 0.52             | 0.081            | 0.928             | 7.1               |  |
|      | 200   |                     |                   |                   |                   | 0.26             | 0.061            | 0.942             | 3.9               | 0.45             | 0.071            | 0.946             | 5.3               | 0.25             | 0.061            | 0.943             | 3.9               |  |
|      | 300   |                     |                   |                   |                   | 0.18             | 0.053            | 0.951             | 2.8               | 0.33             | 0.06             | 0.952             | 3.6               | 0.18             | 0.053            | 0.95              | 2.8               |  |

<sup>a</sup>Percent bias =  $\left(\frac{\hat{\beta}-\beta}{\beta}\right) \times 100\%$ .

<sup>b</sup> $\overline{SE}$ = mean standard error of estimates.

Table 2: Simulation Results when Predictor is Sometimes Incorrect ( $N=1000, \sigma_u = 20$ )

| $p$  | $n_v$ | $\lambda_1$                             |                                       |          | $\lambda_2$              |        |                                     | $\lambda_3$ |                          |        |                                     |          |                          |
|------|-------|-----------------------------------------|---------------------------------------|----------|--------------------------|--------|-------------------------------------|-------------|--------------------------|--------|-------------------------------------|----------|--------------------------|
|      |       | %-Bias <sup>a</sup><br>( $\times 100$ ) | $\overline{SE}^b$<br>( $\times 100$ ) | Coverage | MSE<br>( $\times 10^7$ ) | %-Bias | $\overline{SE}$<br>( $\times 100$ ) | Coverage    | MSE<br>( $\times 10^7$ ) | %-Bias | $\overline{SE}$<br>( $\times 100$ ) | Coverage | MSE<br>( $\times 10^7$ ) |
| 0.05 | 0     | -0.8                                    | 0.032                                 | 0.948    | 1                        |        |                                     |             |                          |        |                                     |          |                          |
|      | 25    |                                         |                                       |          |                          | 0.06   | 0.034                               | 0.95        | 1.3                      | 0      | 0.034                               | 0.949    | 1.2                      |
|      | 50    |                                         |                                       |          |                          | 0.01   | 0.033                               | 0.951       | 1.1                      | -0.01  | 0.033                               | 0.952    | 1.1                      |
|      | 100   |                                         |                                       |          |                          | 0.01   | 0.032                               | 0.952       | 1                        | 0      | 0.032                               | 0.953    | 1                        |
|      | 200   |                                         |                                       |          |                          | 0      | 0.032                               | 0.952       | 1                        | 0      | 0.032                               | 0.952    | 1                        |
|      | 300   |                                         |                                       |          |                          | 0      | 0.032                               | 0.953       | 1                        | 0      | 0.032                               | 0.954    | 1                        |
| 0.1  | 0     | -1.58                                   | 0.032                                 | 0.911    | 1.3                      |        |                                     |             |                          |        |                                     |          |                          |
|      | 25    |                                         |                                       |          |                          | 0.09   | 0.037                               | 0.94        | 1.6                      | -0.02  | 0.036                               | 0.94     | 1.5                      |
|      | 50    |                                         |                                       |          |                          | 0.03   | 0.034                               | 0.947       | 1.3                      | -0.02  | 0.034                               | 0.945    | 1.2                      |
|      | 100   |                                         |                                       |          |                          | 0.01   | 0.033                               | 0.949       | 1.1                      | -0.02  | 0.033                               | 0.95     | 1.1                      |
|      | 200   |                                         |                                       |          |                          | -0.01  | 0.033                               | 0.95        | 1.1                      | -0.02  | 0.033                               | 0.95     | 1.1                      |
|      | 300   |                                         |                                       |          |                          | 0      | 0.032                               | 0.949       | 1.1                      | -0.01  | 0.032                               | 0.949    | 1.1                      |
| 0.2  | 0     | -3.1                                    | 0.032                                 | 0.835    | 2                        |        |                                     |             |                          |        |                                     |          |                          |
|      | 25    |                                         |                                       |          |                          | 0.28   | 0.041                               | 0.943       | 2                        | 0.07   | 0.04                                | 0.941    | 1.8                      |
|      | 50    |                                         |                                       |          |                          | 0.14   | 0.037                               | 0.952       | 1.4                      | 0.05   | 0.036                               | 0.952    | 1.4                      |
|      | 100   |                                         |                                       |          |                          | 0.06   | 0.035                               | 0.954       | 1.2                      | 0.02   | 0.035                               | 0.952    | 1.2                      |
|      | 200   |                                         |                                       |          |                          | 0.03   | 0.033                               | 0.955       | 1.1                      | 0.01   | 0.033                               | 0.954    | 1.1                      |
|      | 300   |                                         |                                       |          |                          | 0.02   | 0.033                               | 0.954       | 1.1                      | 0.01   | 0.033                               | 0.956    | 1.1                      |
| 0.3  | 0     | -4.54                                   | 0.032                                 | 0.696    | 3.1                      |        |                                     |             |                          |        |                                     |          |                          |
|      | 25    |                                         |                                       |          |                          | 0.39   | 0.045                               | 0.939       | 2.4                      | 0.1    | 0.043                               | 0.937    | 2.1                      |
|      | 50    |                                         |                                       |          |                          | 0.21   | 0.039                               | 0.944       | 1.7                      | 0.09   | 0.038                               | 0.942    | 1.6                      |
|      | 100   |                                         |                                       |          |                          | 0.12   | 0.036                               | 0.948       | 1.3                      | 0.06   | 0.036                               | 0.945    | 1.3                      |
|      | 200   |                                         |                                       |          |                          | 0.07   | 0.034                               | 0.947       | 1.2                      | 0.04   | 0.034                               | 0.948    | 1.2                      |
|      | 300   |                                         |                                       |          |                          | 0.06   | 0.034                               | 0.949       | 1.2                      | 0.04   | 0.034                               | 0.948    | 1.2                      |

<sup>a</sup>Percent bias =  $\left(\frac{\hat{\beta}-\beta}{\beta}\right) \times 100\%$ .

<sup>b</sup> $\overline{SE}$ = mean standard error of estimates.

Table 3: Simulation Results when Predictor is Sometimes Incorrect ( $N=500, \sigma_u = 50$ )

| $p$  | $n_v$ | $\lambda_1$         |                                       |          | $\lambda_2$              |        |                                     | $\lambda_3$ |                          |        |                                     |          |                          |
|------|-------|---------------------|---------------------------------------|----------|--------------------------|--------|-------------------------------------|-------------|--------------------------|--------|-------------------------------------|----------|--------------------------|
|      |       | %-Bias <sup>a</sup> | $\overline{SE}^b$<br>( $\times 100$ ) | Coverage | MSE<br>( $\times 10^7$ ) | %-Bias | $\overline{SE}$<br>( $\times 100$ ) | Coverage    | MSE<br>( $\times 10^7$ ) | %-Bias | $\overline{SE}$<br>( $\times 100$ ) | Coverage | MSE<br>( $\times 10^7$ ) |
| 0.05 | 0     | -4.75               | 0.045                                 | 0.798    | 4.6                      |        |                                     |             |                          |        |                                     |          |                          |
|      | 25    |                     |                                       |          |                          | 0.45   | 0.075                               | 0.897       | 11.6                     | 1.21   | 0.103                               | 0.902    | 54.9                     |
|      | 50    |                     |                                       |          |                          | 0.19   | 0.065                               | 0.927       | 5.8                      | 0.45   | 0.069                               | 0.932    | 7.2                      |
|      | 100   |                     |                                       |          |                          | 0.08   | 0.057                               | 0.945       | 3.6                      | 0.15   | 0.058                               | 0.946    | 3.8                      |
|      | 200   |                     |                                       |          |                          | 0.06   | 0.051                               | 0.945       | 2.8                      | 0.09   | 0.051                               | 0.945    | 2.8                      |
| 0.1  | 300   |                     |                                       |          |                          | 0.01   | 0.048                               | 0.947       | 2.5                      | 0.03   | 0.049                               | 0.947    | 2.5                      |
|      | 500   | 0                   | 0.045                                 | 0.949    | 2.1                      |        |                                     |             |                          |        |                                     |          |                          |
|      | 0     | -9.05               | 0.045                                 | 0.475    | 10.6                     |        |                                     |             |                          |        |                                     |          |                          |
|      | 25    |                     |                                       |          |                          | 0.82   | 0.1                                 | 0.855       | 19.4                     | 2.9    | 0.177                               | 0.852    | 100.9                    |
|      | 50    |                     |                                       |          |                          | 0.34   | 0.08                                | 0.911       | 8.7                      | 0.79   | 0.09                                | 0.911    | 12.6                     |
| 0.2  | 100   |                     |                                       |          |                          | 0.24   | 0.066                               | 0.932       | 4.9                      | 0.39   | 0.069                               | 0.936    | 5.5                      |
|      | 200   |                     |                                       |          |                          | 0.16   | 0.056                               | 0.943       | 3.3                      | 0.22   | 0.057                               | 0.945    | 3.5                      |
|      | 300   |                     |                                       |          |                          | 0.1    | 0.052                               | 0.945       | 2.8                      | 0.14   | 0.053                               | 0.945    | 2.9                      |
|      | 500   | 0.02                | 0.045                                 | 0.951    | 2                        |        |                                     |             |                          |        |                                     |          |                          |
|      | 0     | -16.62              | 0.044                                 | 0.051    | 30.1                     |        |                                     |             |                          |        |                                     |          |                          |
| 0.3  | 25    |                     |                                       |          |                          | 1.12   | 0.13                                | 0.824       | 28.2                     | 6.17   | 0.802                               | 0.81     | 140.1                    |
|      | 50    |                     |                                       |          |                          | 0.71   | 0.101                               | 0.909       | 12.5                     | 1.43   | 0.122                               | 0.901    | 19.1                     |
|      | 100   |                     |                                       |          |                          | 0.38   | 0.078                               | 0.942       | 6.7                      | 0.7    | 0.088                               | 0.943    | 8.5                      |
|      | 200   |                     |                                       |          |                          | 0.16   | 0.062                               | 0.948       | 4                        | 0.32   | 0.067                               | 0.948    | 4.7                      |
|      | 300   |                     |                                       |          |                          | 0.06   | 0.056                               | 0.949       | 3.2                      | 0.16   | 0.06                                | 0.95     | 3.7                      |
| 0.3  | 500   | 0                   | 0.045                                 | 0.946    | 2.1                      |        |                                     |             |                          |        |                                     |          |                          |
|      | 0     | -23.01              | 0.044                                 | 0.002    | 55.3                     |        |                                     |             |                          |        |                                     |          |                          |
|      | 25    |                     |                                       |          |                          | 1.73   | 0.152                               | 0.852       | 36.1                     | 5.29   | 0.353                               | 0.821    | 306.7                    |
|      | 50    |                     |                                       |          |                          | 0.81   | 0.113                               | 0.903       | 16.5                     | 1.82   | 0.146                               | 0.889    | 27.4                     |
|      | 100   |                     |                                       |          |                          | 0.36   | 0.086                               | 0.936       | 8.2                      | 0.76   | 0.102                               | 0.939    | 11.4                     |
| 0.3  | 200   |                     |                                       |          |                          | 0.21   | 0.067                               | 0.939       | 4.8                      | 0.38   | 0.076                               | 0.943    | 6.1                      |
|      | 300   |                     |                                       |          |                          | 0.14   | 0.059                               | 0.946       | 3.7                      | 0.24   | 0.066                               | 0.949    | 4.5                      |
|      | 500   | -0.02               | 0.045                                 | 0.95     | 2                        |        |                                     |             |                          |        |                                     |          |                          |

<sup>a</sup>Percent bias =  $\left(\frac{\hat{\beta} - \beta}{\beta}\right) \times 100\%$ .

<sup>b</sup> $\overline{SE}$  = mean standard error of estimates.

Table 4: Simulation Results when Predictor is Sometimes Incorrect ( $N=500, \sigma_u = 20$ )

| $p$  | $n_v$ | $\lambda_1$         |                                       |          | $\lambda_2$              |        |                                     | $\lambda_3$ |                          |        |                                     |          |                          |
|------|-------|---------------------|---------------------------------------|----------|--------------------------|--------|-------------------------------------|-------------|--------------------------|--------|-------------------------------------|----------|--------------------------|
|      |       | %-Bias <sup>a</sup> | $\overline{SE}^b$<br>( $\times 100$ ) | Coverage | MSE<br>( $\times 10^7$ ) | %-Bias | $\overline{SE}$<br>( $\times 100$ ) | Coverage    | MSE<br>( $\times 10^7$ ) | %-Bias | $\overline{SE}$<br>( $\times 100$ ) | Coverage | MSE<br>( $\times 10^7$ ) |
| 0.05 | 0     | -0.73               | 0.045                                 | 0.948    | 2.1                      |        |                                     |             |                          |        |                                     |          |                          |
|      | 25    |                     |                                       |          |                          | 0.14   | 0.047                               | 0.95        | 2.3                      | 0.1    | 0.047                               | 0.949    | 2.3                      |
|      | 50    |                     |                                       |          |                          | 0.1    | 0.046                               | 0.952       | 2.2                      | 0.08   | 0.046                               | 0.952    | 2.2                      |
|      | 100   |                     |                                       |          |                          | 0.08   | 0.045                               | 0.951       | 2.1                      | 0.07   | 0.045                               | 0.95     | 2.1                      |
|      | 200   |                     |                                       |          |                          | 0.06   | 0.045                               | 0.951       | 2.1                      | 0.06   | 0.045                               | 0.951    | 2.1                      |
| 0.1  | 300   |                     |                                       |          |                          | 0.06   | 0.045                               | 0.951       | 2.1                      | 0.06   | 0.045                               | 0.951    | 2.1                      |
|      | 500   | 0.06                | 0.045                                 | 0.953    | 2                        |        |                                     |             |                          |        |                                     |          |                          |
|      | 0     | -1.51               | 0.045                                 | 0.933    | 2.3                      |        |                                     |             |                          |        |                                     |          |                          |
|      | 25    |                     |                                       |          |                          | 0.2    | 0.049                               | 0.947       | 2.6                      | 0.11   | 0.048                               | 0.944    | 2.5                      |
|      | 50    |                     |                                       |          |                          | 0.11   | 0.047                               | 0.946       | 2.3                      | 0.07   | 0.047                               | 0.944    | 2.3                      |
| 0.2  | 100   |                     |                                       |          |                          | 0.09   | 0.046                               | 0.947       | 2.2                      | 0.07   | 0.046                               | 0.947    | 2.2                      |
|      | 200   |                     |                                       |          |                          | 0.09   | 0.046                               | 0.946       | 2.1                      | 0.08   | 0.046                               | 0.945    | 2.1                      |
|      | 300   |                     |                                       |          |                          | 0.08   | 0.045                               | 0.946       | 2.1                      | 0.08   | 0.045                               | 0.946    | 2.1                      |
|      | 500   | 0.05                | 0.045                                 | 0.951    | 2.1                      |        |                                     |             |                          |        |                                     |          |                          |
|      | 0     | -3.15               | 0.045                                 | 0.894    | 3                        |        |                                     |             |                          |        |                                     |          |                          |
| 0.3  | 25    |                     |                                       |          |                          | 0.31   | 0.053                               | 0.949       | 3                        | 0.08   | 0.052                               | 0.95     | 2.8                      |
|      | 50    |                     |                                       |          |                          | 0.15   | 0.049                               | 0.952       | 2.5                      | 0.05   | 0.049                               | 0.952    | 2.4                      |
|      | 100   |                     |                                       |          |                          | 0.06   | 0.047                               | 0.949       | 2.2                      | 0.02   | 0.047                               | 0.949    | 2.2                      |
|      | 200   |                     |                                       |          |                          | 0.01   | 0.046                               | 0.949       | 2.2                      | -0.01  | 0.046                               | 0.949    | 2.2                      |
|      | 300   |                     |                                       |          |                          | 0      | 0.046                               | 0.948       | 2.1                      | -0.01  | 0.046                               | 0.948    | 2.1                      |
| 0.3  | 500   | -0.03               | 0.045                                 | 0.951    | 2                        |        |                                     |             |                          |        |                                     |          |                          |
|      | 0     | -4.53               | 0.045                                 | 0.825    | 4.1                      |        |                                     |             |                          |        |                                     |          |                          |
|      | 25    |                     |                                       |          |                          | 0.45   | 0.056                               | 0.942       | 3.5                      | 0.19   | 0.055                               | 0.942    | 3.2                      |
|      | 50    |                     |                                       |          |                          | 0.28   | 0.051                               | 0.946       | 2.7                      | 0.16   | 0.051                               | 0.944    | 2.7                      |
|      | 100   |                     |                                       |          |                          | 0.15   | 0.049                               | 0.946       | 2.4                      | 0.1    | 0.048                               | 0.945    | 2.4                      |
| 0.3  | 200   |                     |                                       |          |                          | 0.07   | 0.047                               | 0.945       | 2.3                      | 0.05   | 0.047                               | 0.945    | 2.3                      |
|      | 300   |                     |                                       |          |                          | 0.06   | 0.047                               | 0.944       | 2.3                      | 0.06   | 0.047                               | 0.946    | 2.3                      |
|      | 500   | 0.03                | 0.045                                 | 0.947    | 2                        |        |                                     |             |                          |        |                                     |          |                          |

<sup>a</sup>Percent bias =  $\left(\frac{\hat{\beta} - \beta}{\beta}\right) \times 100\%$ .

<sup>b</sup> $\overline{SE}$  = mean standard error of estimates.

Table 5: Simulation Results when Predictor is Sometimes Incorrect ( $N=100, \sigma_u = 50$ )

| $p$  | $n_v$ | $\hat{\lambda}_1$   |                                       |          | $\hat{\lambda}_2$        |        |                                     | $\hat{\lambda}_3$ |                          |        |                                     |          |                          |
|------|-------|---------------------|---------------------------------------|----------|--------------------------|--------|-------------------------------------|-------------------|--------------------------|--------|-------------------------------------|----------|--------------------------|
|      |       | %-Bias <sup>a</sup> | $\overline{SE}^b$<br>( $\times 100$ ) | Coverage | MSE<br>( $\times 10^7$ ) | %-Bias | $\overline{SE}$<br>( $\times 100$ ) | Coverage          | MSE<br>( $\times 10^7$ ) | %-Bias | $\overline{SE}$<br>( $\times 100$ ) | Coverage | MSE<br>( $\times 10^7$ ) |
| 0.05 | 0     | -4.47               | 0.101                                 | 0.911    | 13                       |        |                                     |                   |                          |        |                                     |          |                          |
|      | 25    |                     |                                       |          |                          | 0.52   | 0.119                               | 0.932             | 18.1                     | 1.19   | 0.131                               | 0.937    | 28.1                     |
|      | 50    |                     |                                       |          |                          | 0.36   | 0.109                               | 0.932             | 13.3                     | 0.59   | 0.111                               | 0.935    | 14.3                     |
| 0.1  | 100   | 0.12                | 0.101                                 | 0.953    | 10.1                     |        |                                     |                   |                          |        |                                     |          |                          |
|      | 0     | -8.89               | 0.1                                   | 0.829    | 19.8                     |        |                                     |                   |                          |        |                                     |          |                          |
|      | 25    |                     |                                       |          |                          | 0.68   | 0.136                               | 0.93              | 24.5                     | 2.22   | 0.166                               | 0.933    | 51.8                     |
| 0.2  | 50    |                     |                                       |          |                          | 0.51   | 0.117                               | 0.931             | 16                       | 0.85   | 0.123                               | 0.935    | 18.1                     |
|      | 100   | -0.03               | 0.101                                 | 0.943    | 10.4                     |        |                                     |                   |                          |        |                                     |          |                          |
|      | 0     | -16.32              | 0.1                                   | 0.6      | 38.9                     |        |                                     |                   |                          |        |                                     |          |                          |
| 0.3  | 25    |                     |                                       |          |                          | 1.19   | 0.159                               | 0.933             | 33                       | 3.16   | 0.208                               | 0.936    | 65                       |
|      | 50    |                     |                                       |          |                          | 0.63   | 0.13                                | 0.943             | 18.6                     | 1.16   | 0.143                               | 0.95     | 22.5                     |
|      | 100   | 0.13                | 0.101                                 | 0.947    | 10.2                     |        |                                     |                   |                          |        |                                     |          |                          |
| 0.3  | 0     | -22.79              | 0.098                                 | 0.373    | 64                       |        |                                     |                   |                          |        |                                     |          |                          |
|      | 25    |                     |                                       |          |                          | 1.69   | 0.176                               | 0.925             | 38.4                     | 6.46   | 0.436                               | 0.925    | 555.7                    |
|      | 50    |                     |                                       |          |                          | 0.71   | 0.139                               | 0.941             | 21                       | 1.69   | 0.162                               | 0.943    | 30.1                     |
| 0.3  | 100   | -0.1                | 0.101                                 | 0.948    | 10.1                     |        |                                     |                   |                          |        |                                     |          |                          |

<sup>a</sup>Percent bias =  $\left(\frac{\hat{\beta} - \beta}{\beta}\right) \times 100\%$ .

<sup>b</sup> $\overline{SE}$  = mean standard error of estimates.



Table 6: Simulation Results when Predictor is Sometimes Incorrect ( $N=100, \sigma_u = 20$ )

| $p$  | $n_v$ | $\hat{\lambda}_1$   |                                       |          |                          | $\hat{\lambda}_2$ |                                     |          |                          | $\hat{\lambda}_3$ |                                     |          |                          |        |                                     |          |                          |
|------|-------|---------------------|---------------------------------------|----------|--------------------------|-------------------|-------------------------------------|----------|--------------------------|-------------------|-------------------------------------|----------|--------------------------|--------|-------------------------------------|----------|--------------------------|
|      |       | %-Bias <sup>a</sup> | $\overline{SE}^b$<br>( $\times 100$ ) | Coverage | MSE<br>( $\times 10^7$ ) | %-Bias            | $\overline{SE}$<br>( $\times 100$ ) | Coverage | MSE<br>( $\times 10^7$ ) | %-Bias            | $\overline{SE}$<br>( $\times 100$ ) | Coverage | MSE<br>( $\times 10^7$ ) | %-Bias | $\overline{SE}$<br>( $\times 100$ ) | Coverage | MSE<br>( $\times 10^7$ ) |
| 0.05 | 0     | -0.8                | 0.101                                 | 0.949    | 10.2                     | 0.04              | 0.101                               | 0.944    | 10.5                     | -0.01             | 0.101                               | 0.945    | 10.4                     | 0.12   | 0.101                               | 0.941    | 12.9                     |
|      | 25    |                     |                                       |          |                          | 0.01              | 0.1                                 | 0.943    | 10.3                     | 0                 | 0.1                                 | 0.944    | 10.3                     | 0.11   | 0.1                                 | 0.941    | 12                       |
|      | 100   | 0.02                | 0.101                                 | 0.949    | 10                       |                   |                                     |          |                          |                   |                                     |          |                          |        |                                     |          |                          |
| 0.1  | 0     | -1.58               | 0.101                                 | 0.945    | 10.5                     | 0.16              | 0.102                               | 0.94     | 11                       | 0.09              | 0.102                               | 0.94     | 10.9                     | 0.19   | 0.102                               | 0.94     | 11.6                     |
|      | 25    |                     |                                       |          |                          | 0.06              | 0.101                               | 0.94     | 10.6                     | 0.04              | 0.101                               | 0.94     | 10.6                     | 0.08   | 0.101                               | 0.939    | 10.7                     |
|      | 100   | -0.01               | 0.101                                 | 0.949    | 10.2                     |                   |                                     |          |                          |                   |                                     |          |                          |        |                                     |          |                          |
| 0.2  | 0     | -3.17               | 0.101                                 | 0.936    | 11.3                     | 0.26              | 0.105                               | 0.938    | 11.7                     | 0.12              | 0.104                               | 0.936    | 11.7                     | 0.23   | 0.104                               | 0.938    | 11.7                     |
|      | 25    |                     |                                       |          |                          | 0.06              | 0.102                               | 0.937    | 11.2                     | 0.02              | 0.102                               | 0.935    | 11.2                     | 0.06   | 0.102                               | 0.936    | 11.1                     |
|      | 100   | -0.02               | 0.101                                 | 0.947    | 10.2                     |                   |                                     |          |                          |                   |                                     |          |                          |        |                                     |          |                          |
| 0.3  | 0     | -4.84               | 0.101                                 | 0.919    | 12.7                     | 0.05              | 0.107                               | 0.933    | 12.3                     | -0.14             | 0.106                               | 0.932    | 12.1                     | 0.06   | 0.107                               | 0.933    | 12.2                     |
|      | 25    |                     |                                       |          |                          | -0.14             | 0.104                               | 0.934    | 11.4                     | -0.16             | 0.104                               | 0.933    | 11.5                     | -0.14  | 0.104                               | 0.934    | 11.4                     |
|      | 100   | -0.26               | 0.101                                 | 0.943    | 10.5                     |                   |                                     |          |                          |                   |                                     |          |                          |        |                                     |          |                          |

<sup>a</sup>Percent bias =  $\left(\frac{\hat{\beta}-\beta}{\beta}\right) \times 100\%$ .

<sup>b</sup> $\overline{SE}$ = mean standard error of estimates.

Table 7: Simulation Results when Predictor and Outcome are Sometimes Incorrect (N=1000,  $\sigma_u=50$ )

| $p$  | $n_v$ | $\rho_{u,v^*} = -0.5$ |                                              |          |                          | $\rho_{u,v^*} = 0$ |                                            |          |                          | $\rho_{u,v^*} = 0.5$ |                                            |          |                          |
|------|-------|-----------------------|----------------------------------------------|----------|--------------------------|--------------------|--------------------------------------------|----------|--------------------------|----------------------|--------------------------------------------|----------|--------------------------|
|      |       | %-Bias <sup>a</sup>   | $\overline{\text{SE}}^b$<br>( $\times 100$ ) | Coverage | MSE<br>( $\times 10^7$ ) | %-Bias             | $\overline{\text{SE}}$<br>( $\times 100$ ) | Coverage | MSE<br>( $\times 10^7$ ) | %-Bias               | $\overline{\text{SE}}$<br>( $\times 100$ ) | Coverage | MSE<br>( $\times 10^7$ ) |
| 0.05 | 0     | -2.44                 | 0.042                                        | 0.906    | 2.4                      | -4.72              | 0.043                                      | 0.791    | 4.2                      | -7.21                | 0.043                                      | 0.607    | 7.3                      |
|      | 25    | -2.52                 | 0.073                                        | 0.88     | 15.3                     | -1.01              | 0.087                                      | 0.852    | 20                       | 0.66                 | 0.102                                      | 0.798    | 28.4                     |
|      | 50    | -2.51                 | 0.061                                        | 0.871    | 7.1                      | -1.28              | 0.072                                      | 0.878    | 8.5                      | 0.16                 | 0.085                                      | 0.865    | 12.7                     |
|      | 100   | -1.62                 | 0.053                                        | 0.913    | 3.7                      | -0.85              | 0.061                                      | 0.917    | 4.5                      | -0.15                | 0.07                                       | 0.919    | 6.1                      |
|      | 200   | -0.83                 | 0.048                                        | 0.941    | 2.5                      | -0.48              | 0.053                                      | 0.942    | 2.9                      | -0.11                | 0.059                                      | 0.949    | 3.7                      |
|      | 300   | -0.56                 | 0.046                                        | 0.945    | 2.2                      | -0.29              | 0.049                                      | 0.943    | 2.5                      | -0.14                | 0.053                                      | 0.951    | 2.9                      |
|      | 1000  | -0.04                 | 0.032                                        | 0.95     | 1                        | -0.02              | 0.032                                      | 0.952    | 1                        | 0.01                 | 0.032                                      | 0.95     | 1                        |
| 0.1  | 0     | -4.5                  | 0.042                                        | 0.799    | 3.9                      | -9.17              | 0.043                                      | 0.429    | 10.4                     | -13.63               | 0.044                                      | 0.149    | 20.9                     |
|      | 25    | -4.94                 | 0.098                                        | 0.79     | 27.5                     | -1.54              | 0.125                                      | 0.756    | 36.6                     | 1.68                 | 0.152                                      | 0.723    | 56.8                     |
|      | 50    | -2.87                 | 0.075                                        | 0.849    | 10.1                     | -1.33              | 0.096                                      | 0.847    | 13.7                     | 0.38                 | 0.116                                      | 0.839    | 20.3                     |
|      | 100   | -1.32                 | 0.062                                        | 0.927    | 4.6                      | -0.73              | 0.075                                      | 0.919    | 6.6                      | 0.05                 | 0.09                                       | 0.915    | 9.6                      |
|      | 200   | -0.61                 | 0.053                                        | 0.945    | 3                        | -0.33              | 0.061                                      | 0.943    | 3.9                      | -0.01                | 0.07                                       | 0.943    | 5.1                      |
|      | 300   | -0.37                 | 0.05                                         | 0.948    | 2.6                      | -0.28              | 0.055                                      | 0.952    | 3.1                      | 0.06                 | 0.062                                      | 0.952    | 3.8                      |
|      | 1000  | -0.03                 | 0.032                                        | 0.944    | 1                        | -0.05              | 0.032                                      | 0.95     | 1                        | -0.03                | 0.032                                      | 0.951    | 1                        |
| 0.2  | 0     | -8.43                 | 0.041                                        | 0.455    | 8.9                      | -16.64             | 0.043                                      | 0.037    | 29.8                     | -24.91               | 0.044                                      | 0.001    | 64.5                     |
|      | 25    | -6.1                  | 0.133                                        | 0.773    | 39.7                     | -1.1               | 0.176                                      | 0.765    | 56.6                     | 3.39                 | 0.222                                      | 0.784    | 90.1                     |
|      | 50    | -2.7                  | 0.099                                        | 0.872    | 14.3                     | -0.75              | 0.128                                      | 0.862    | 21.5                     | 1.51                 | 0.161                                      | 0.866    | 34.9                     |
|      | 100   | -1.33                 | 0.077                                        | 0.923    | 7.1                      | -0.34              | 0.096                                      | 0.918    | 10.4                     | 0.76                 | 0.118                                      | 0.919    | 16.1                     |
|      | 200   | -0.75                 | 0.062                                        | 0.944    | 4                        | -0.16              | 0.074                                      | 0.941    | 5.7                      | 0.48                 | 0.087                                      | 0.944    | 8.1                      |
|      | 300   | -0.55                 | 0.056                                        | 0.947    | 3.2                      | -0.06              | 0.064                                      | 0.949    | 4.2                      | 0.28                 | 0.073                                      | 0.947    | 5.7                      |
|      | 1000  | -0.1                  | 0.032                                        | 0.947    | 1                        | 0.03               | 0.032                                      | 0.955    | 1                        | -0.02                | 0.032                                      | 0.953    | 1                        |
| 0.3  | 0     | -11.59                | 0.04                                         | 0.178    | 15.1                     | -22.99             | 0.042                                      | 0.001    | 54.9                     | -34.48               | 0.044                                      | 0        | 121.4                    |
|      | 25    | -5.09                 | 0.162                                        | 0.811    | 46.7                     | -0.45              | 0.212                                      | 0.81     | 72.8                     | 3.95                 | 0.264                                      | 0.818    | 117.3                    |
|      | 50    | -2.07                 | 0.118                                        | 0.896    | 17.7                     | -0.1               | 0.153                                      | 0.882    | 29                       | 1.69                 | 0.188                                      | 0.889    | 43.9                     |
|      | 100   | -1.08                 | 0.088                                        | 0.93     | 8.7                      | -0.06              | 0.112                                      | 0.93     | 12.9                     | 0.99                 | 0.136                                      | 0.932    | 20                       |
|      | 200   | -0.52                 | 0.069                                        | 0.946    | 4.9                      | -0.03              | 0.083                                      | 0.948    | 7                        | 0.5                  | 0.098                                      | 0.942    | 10.2                     |
|      | 300   | -0.42                 | 0.061                                        | 0.946    | 3.8                      | -0.06              | 0.071                                      | 0.949    | 5.1                      | 0.43                 | 0.082                                      | 0.949    | 6.9                      |
|      | 1000  | 0.03                  | 0.032                                        | 0.953    | 1                        | 0                  | 0.032                                      | 0.953    | 1                        | -0.03                | 0.032                                      | 0.946    | 1                        |

<sup>a</sup>Percent bias =  $\left(\frac{\hat{\beta}-\beta}{\beta}\right) \times 100\%$ .

<sup>b</sup> $\overline{\text{SE}}$ = mean standard error of estimates.

Table 8: Simulation Results when Predictor and Outcome are Sometimes Incorrect (N=1000,  $\sigma_u=20$ )

| $p$  | $n_v$ | $\rho_{u,v^*} = -0.5$ |                                              |          |                          | $\rho_{u,v^*} = 0$ |                                            |          |                          | $\rho_{u,v^*} = 0.5$ |                                            |          |                          |      |
|------|-------|-----------------------|----------------------------------------------|----------|--------------------------|--------------------|--------------------------------------------|----------|--------------------------|----------------------|--------------------------------------------|----------|--------------------------|------|
|      |       | %-Bias <sup>a</sup>   | $\overline{\text{SE}}^b$<br>( $\times 100$ ) | Coverage | MSE<br>( $\times 10^7$ ) | %-Bias             | $\overline{\text{SE}}$<br>( $\times 100$ ) | Coverage | MSE<br>( $\times 10^7$ ) | %-Bias               | $\overline{\text{SE}}$<br>( $\times 100$ ) | Coverage | MSE<br>( $\times 10^7$ ) |      |
| 0.05 | 0     | 0.2                   | 0.043                                        | 0.953    | 1.8                      | -0.82              | 0.043                                      | 0.953    | 1.9                      | -1.79                | 0.043                                      | 0.937    | 2.2                      |      |
|      | 25    | -0.87                 | 0.049                                        | 0.931    | 4.1                      | -0.28              | 0.052                                      | 0.935    | 4.7                      | 0.26                 | 0.054                                      | 0.946    | 4.5                      |      |
|      | 50    | -0.65                 | 0.046                                        | 0.933    | 2.6                      | -0.16              | 0.047                                      | 0.943    | 2.7                      | 0.2                  | 0.049                                      | 0.95     | 2.8                      |      |
|      | 100   | -0.36                 | 0.044                                        | 0.944    | 2.1                      | -0.14              | 0.045                                      | 0.955    | 2.1                      | 0.08                 | 0.046                                      | 0.951    | 2.2                      |      |
|      | 200   | -0.15                 | 0.043                                        | 0.95     | 1.9                      | -0.12              | 0.044                                      | 0.954    | 1.9                      | 0.02                 | 0.045                                      | 0.957    | 2                        |      |
|      | 300   | -0.11                 | 0.043                                        | 0.954    | 1.8                      | -0.08              | 0.044                                      | 0.951    | 1.9                      | 0.02                 | 0.044                                      | 0.951    | 1.9                      |      |
|      | 1000  | 0.01                  | 0.032                                        | 0.939    | 1.1                      | 0.02               | 0.032                                      | 0.946    | 1.1                      | -0.05                | 0.032                                      | 0.953    | 1                        |      |
|      | 0.1   | 0                     | 0.36                                         | 0.043    | 0.941                    | 1.9                | -1.51                                      | 0.044    | 0.947                    | 2.2                  | -3.58                                      | 0.044    | 0.863                    | 3.3  |
|      |       | 25                    | -1.63                                        | 0.055    | 0.904                    | 5.6                | -0.11                                      | 0.059    | 0.934                    | 5.6                  | 0.9                                        | 0.066    | 0.915                    | 7.6  |
|      |       | 50                    | -0.83                                        | 0.049    | 0.932                    | 2.9                | 0.04                                       | 0.052    | 0.94                     | 3.3                  | 0.08                                       | 0.055    | 0.931                    | 3.6  |
| 100  |       | -0.36                 | 0.046                                        | 0.937    | 2.3                      | 0.08               | 0.048                                      | 0.952    | 2.5                      | -0.01                | 0.05                                       | 0.946    | 2.6                      |      |
| 200  |       | -0.18                 | 0.044                                        | 0.94     | 2.1                      | 0.1                | 0.046                                      | 0.948    | 2.2                      | -0.04                | 0.047                                      | 0.945    | 2.3                      |      |
| 300  |       | -0.16                 | 0.044                                        | 0.939    | 2.1                      | 0.07               | 0.045                                      | 0.944    | 2.2                      | -0.05                | 0.046                                      | 0.949    | 2.1                      |      |
| 1000 |       | -0.07                 | 0.032                                        | 0.945    | 1                        | -0.07              | 0.032                                      | 0.947    | 1.1                      | -0.01                | 0.032                                      | 0.951    | 1                        |      |
| 0.2  |       | 0                     | 0.86                                         | 0.044    | 0.953                    | 1.9                | -3.16                                      | 0.044    | 0.886                    | 2.9                  | -7.14                                      | 0.045    | 0.645                    | 7.2  |
|      |       | 25                    | -2.2                                         | 0.065    | 0.918                    | 7.7                | -0.8                                       | 0.069    | 0.909                    | 7.5                  | 1.15                                       | 0.084    | 0.903                    | 10.3 |
|      |       | 50                    | -0.88                                        | 0.055    | 0.945                    | 3.4                | -0.44                                      | 0.058    | 0.942                    | 3.7                  | 0.29                                       | 0.067    | 0.933                    | 5.4  |
|      | 100   | -0.37                 | 0.05                                         | 0.953    | 2.5                      | -0.22              | 0.052                                      | 0.955    | 2.7                      | 0.07                 | 0.057                                      | 0.939    | 3.5                      |      |
|      | 200   | -0.12                 | 0.047                                        | 0.959    | 2.1                      | -0.17              | 0.048                                      | 0.954    | 2.4                      | -0.05                | 0.051                                      | 0.95     | 2.8                      |      |
|      | 300   | -0.08                 | 0.046                                        | 0.956    | 2                        | -0.18              | 0.047                                      | 0.958    | 2.2                      | -0.11                | 0.049                                      | 0.943    | 2.5                      |      |
|      | 1000  | -0.17                 | 0.032                                        | 0.952    | 1                        | -0.01              | 0.032                                      | 0.953    | 1                        | -0.08                | 0.032                                      | 0.952    | 1                        |      |
|      | 0.3   | 0                     | 1.12                                         | 0.044    | 0.926                    | 2.1                | -4.89                                      | 0.045    | 0.816                    | 4.4                  | -10.31                                     | 0.046    | 0.404                    | 12.8 |
|      |       | 25                    | -1.91                                        | 0.074    | 0.935                    | 8.2                | -0.28                                      | 0.084    | 0.932                    | 10.6                 | 2                                          | 0.101    | 0.908                    | 15.8 |
|      |       | 50                    | -0.77                                        | 0.06     | 0.956                    | 4.1                | -0.3                                       | 0.067    | 0.949                    | 5.1                  | 0.66                                       | 0.077    | 0.941                    | 6.8  |
| 100  |       | -0.53                 | 0.053                                        | 0.948    | 2.9                      | -0.2               | 0.057                                      | 0.953    | 3.2                      | 0.14                 | 0.063                                      | 0.957    | 4.1                      |      |
| 200  |       | -0.3                  | 0.049                                        | 0.951    | 2.4                      | -0.2               | 0.051                                      | 0.962    | 2.5                      | 0.1                  | 0.055                                      | 0.957    | 3                        |      |
| 300  |       | -0.18                 | 0.048                                        | 0.945    | 2.3                      | -0.33              | 0.049                                      | 0.957    | 2.3                      | 0.02                 | 0.052                                      | 0.943    | 2.7                      |      |
| 1000 |       | 0                     | 0.032                                        | 0.952    | 1                        | -0.09              | 0.032                                      | 0.936    | 1.1                      | -0.06                | 0.032                                      | 0.952    | 1                        |      |

<sup>a</sup>Percent bias =  $\left(\frac{\hat{\beta}-\beta}{\beta}\right) \times 100\%$ .

<sup>b</sup> $\overline{\text{SE}}$ = mean standard error of estimates.

Table 9: Simulation Results when Predictor and Outcome are Sometimes Incorrect (N=500,  $\sigma_u=50$ )

| $p$  | $n_v$ | $\rho_{u,v^*} = -0.5$ |                                              |          |                          | $\rho_{u,v^*} = 0$ |                                            |          |                          | $\rho_{u,v^*} = 0.5$ |                                            |          |                          |       |
|------|-------|-----------------------|----------------------------------------------|----------|--------------------------|--------------------|--------------------------------------------|----------|--------------------------|----------------------|--------------------------------------------|----------|--------------------------|-------|
|      |       | %-Bias <sup>a</sup>   | $\overline{\text{SE}}^b$<br>( $\times 100$ ) | Coverage | MSE<br>( $\times 10^7$ ) | %-Bias             | $\overline{\text{SE}}$<br>( $\times 100$ ) | Coverage | MSE<br>( $\times 10^7$ ) | %-Bias               | $\overline{\text{SE}}$<br>( $\times 100$ ) | Coverage | MSE<br>( $\times 10^7$ ) |       |
| 0.05 | 0     | -1.83                 | 0.059                                        | 0.933    | 4                        | -4.81              | 0.06                                       | 0.853    | 6.3                      | -7.05                | 0.061                                      | 0.759    | 9.4                      |       |
|      | 25    | -2.62                 | 0.087                                        | 0.892    | 17.4                     | -1.6               | 0.097                                      | 0.904    | 16.8                     | 0.95                 | 0.118                                      | 0.88     | 27.9                     |       |
|      | 50    | -2.45                 | 0.075                                        | 0.888    | 9.4                      | -1.52              | 0.084                                      | 0.911    | 9.2                      | 0.46                 | 0.098                                      | 0.927    | 13.9                     |       |
|      | 100   | -1.22                 | 0.068                                        | 0.932    | 5.3                      | -0.94              | 0.074                                      | 0.944    | 5.8                      | 0.16                 | 0.083                                      | 0.946    | 7.6                      |       |
|      | 200   | -0.26                 | 0.064                                        | 0.946    | 4.3                      | -0.49              | 0.067                                      | 0.949    | 4.6                      | 0                    | 0.071                                      | 0.951    | 5                        |       |
|      | 300   | 0.06                  | 0.062                                        | 0.95     | 4                        | -0.41              | 0.064                                      | 0.947    | 4.2                      | 0.03                 | 0.066                                      | 0.951    | 4.4                      |       |
|      | 1000  | 0.3                   | 0.045                                        | 0.943    | 2.1                      | -0.08              | 0.045                                      | 0.958    | 1.9                      | -0.02                | 0.045                                      | 0.935    | 2.1                      |       |
|      | 0.1   | 0                     | -4.27                                        | 0.059    | 0.888                    | 5.6                | -8.91                                      | 0.06     | 0.664                    | 12.2                 | -13.7                                      | 0.062    | 0.394                    | 23.5  |
|      |       | 25                    | -3.81                                        | 0.113    | 0.856                    | 31.3               | -2.62                                      | 0.127    | 0.838                    | 28.6                 | 1.63                                       | 0.161    | 0.81                     | 55.8  |
|      |       | 50                    | -1.92                                        | 0.089    | 0.91                     | 10.6               | -1.95                                      | 0.102    | 0.907                    | 12.9                 | 0.17                                       | 0.124    | 0.893                    | 20.9  |
| 100  |       | -0.86                 | 0.075                                        | 0.939    | 6.1                      | -0.84              | 0.086                                      | 0.937    | 7.9                      | -0.19                | 0.098                                      | 0.935    | 10.2                     |       |
| 200  |       | -0.33                 | 0.068                                        | 0.941    | 4.6                      | -0.6               | 0.073                                      | 0.953    | 5.2                      | -0.29                | 0.079                                      | 0.948    | 6.8                      |       |
| 300  |       | -0.11                 | 0.065                                        | 0.947    | 4.2                      | -0.24              | 0.068                                      | 0.944    | 4.8                      | -0.36                | 0.072                                      | 0.943    | 5.5                      |       |
| 1000 |       | 0.27                  | 0.045                                        | 0.947    | 2                        | -0.01              | 0.045                                      | 0.951    | 2.1                      | -0.1                 | 0.045                                      | 0.955    | 2                        |       |
| 0.2  |       | 0                     | -8.5                                         | 0.058    | 0.681                    | 10.9               | -16.18                                     | 0.06     | 0.25                     | 30.5                 | -24.66                                     | 0.062    | 0.032                    | 65.8  |
|      |       | 25                    | -6.88                                        | 0.14     | 0.801                    | 40.6               | -0.57                                      | 0.184    | 0.826                    | 58.7                 | 1.81                                       | 0.215    | 0.808                    | 72.6  |
|      |       | 50                    | -3.09                                        | 0.107    | 0.901                    | 15.2               | -0.05                                      | 0.136    | 0.908                    | 24.4                 | 1.13                                       | 0.164    | 0.893                    | 35.5  |
|      | 100   | -1.42                 | 0.087                                        | 0.947    | 8.4                      | 0.17               | 0.104                                      | 0.937    | 12.3                     | 0.61                 | 0.122                                      | 0.937    | 15.4                     |       |
|      | 200   | -0.77                 | 0.074                                        | 0.94     | 5.7                      | 0.08               | 0.083                                      | 0.937    | 7.4                      | 0.56                 | 0.092                                      | 0.963    | 8.1                      |       |
|      | 300   | -0.54                 | 0.07                                         | 0.938    | 5                        | 0.21               | 0.075                                      | 0.936    | 6.2                      | 0.27                 | 0.08                                       | 0.96     | 6                        |       |
|      | 1000  | 0.01                  | 0.045                                        | 0.955    | 1.9                      | 0.25               | 0.045                                      | 0.931    | 2.2                      | 0.15                 | 0.045                                      | 0.951    | 1.9                      |       |
|      | 0.3   | 0                     | -11.26                                       | 0.057    | 0.496                    | 16.3               | -23.17                                     | 0.06     | 0.036                    | 57.7                 | -34.39                                     | 0.063    | 0.002                    | 124   |
|      |       | 25                    | -5.54                                        | 0.169    | 0.839                    | 46.7               | -0.24                                      | 0.224    | 0.831                    | 77.2                 | 4.78                                       | 0.265    | 0.845                    | 102.5 |
|      |       | 50                    | -2.41                                        | 0.125    | 0.914                    | 19.2               | -0.61                                      | 0.158    | 0.899                    | 32.1                 | 2.12                                       | 0.191    | 0.915                    | 42.6  |
| 100  |       | -1.24                 | 0.098                                        | 0.933    | 10.8                     | -0.33              | 0.118                                      | 0.946    | 14.9                     | 0.88                 | 0.139                                      | 0.943    | 20.4                     |       |
| 200  |       | -0.65                 | 0.081                                        | 0.948    | 6.9                      | -0.03              | 0.091                                      | 0.952    | 8                        | 0.53                 | 0.102                                      | 0.95     | 10.6                     |       |
| 300  |       | -0.39                 | 0.074                                        | 0.94     | 5.7                      | -0.17              | 0.08                                       | 0.958    | 6.2                      | 0.54                 | 0.086                                      | 0.955    | 7.6                      |       |
| 1000 |       | 0.01                  | 0.045                                        | 0.939    | 2.2                      | 0.18               | 0.045                                      | 0.954    | 1.8                      | 0.02                 | 0.045                                      | 0.942    | 2.1                      |       |

<sup>a</sup>Percent bias =  $\left(\frac{\hat{\beta}-\beta}{\beta}\right) \times 100\%$ .

<sup>b</sup> $\overline{\text{SE}}$ = mean standard error of estimates.

Table 10: Simulation Results when Predictor and Outcome are Sometimes Incorrect (N=500,  $\sigma_u=20$ )

| $p$  | $n_v$ | $\rho_{u,v^*} = -0.5$ |                                              |          |                          | $\rho_{u,v^*} = 0$ |                                            |          |                          | $\rho_{u,v^*} = 0.5$ |                                            |          |                          |      |
|------|-------|-----------------------|----------------------------------------------|----------|--------------------------|--------------------|--------------------------------------------|----------|--------------------------|----------------------|--------------------------------------------|----------|--------------------------|------|
|      |       | %-Bias <sup>a</sup>   | $\overline{\text{SE}}^b$<br>( $\times 100$ ) | Coverage | MSE<br>( $\times 10^7$ ) | %-Bias             | $\overline{\text{SE}}$<br>( $\times 100$ ) | Coverage | MSE<br>( $\times 10^7$ ) | %-Bias               | $\overline{\text{SE}}$<br>( $\times 100$ ) | Coverage | MSE<br>( $\times 10^7$ ) |      |
| 0.05 | 0     | 0.26                  | 0.06                                         | 0.952    | 3.8                      | -0.86              | 0.061                                      | 0.946    | 3.8                      | -1.71                | 0.061                                      | 0.943    | 4                        |      |
|      | 25    | -0.61                 | 0.065                                        | 0.941    | 5.6                      | -0.34              | 0.066                                      | 0.94     | 5.6                      | 0.74                 | 0.071                                      | 0.944    | 7.4                      |      |
|      | 50    | -0.48                 | 0.062                                        | 0.938    | 4.5                      | -0.19              | 0.063                                      | 0.943    | 4.3                      | 0.47                 | 0.066                                      | 0.943    | 5                        |      |
|      | 100   | -0.31                 | 0.061                                        | 0.952    | 3.9                      | -0.22              | 0.062                                      | 0.942    | 4                        | 0.29                 | 0.063                                      | 0.95     | 4.1                      |      |
|      | 200   | -0.12                 | 0.061                                        | 0.95     | 3.9                      | -0.1               | 0.061                                      | 0.94     | 3.8                      | 0.15                 | 0.062                                      | 0.955    | 3.8                      |      |
|      | 300   | -0.06                 | 0.06                                         | 0.953    | 3.9                      | -0.1               | 0.061                                      | 0.938    | 3.7                      | 0.12                 | 0.061                                      | 0.958    | 3.8                      |      |
|      | 1000  | 0.03                  | 0.045                                        | 0.955    | 2                        | 0.14               | 0.045                                      | 0.948    | 2.1                      | -0.04                | 0.045                                      | 0.942    | 2                        |      |
|      | 0.1   | 0                     | 0.19                                         | 0.061    | 0.943                    | 3.8                | -1.67                                      | 0.061    | 0.933                    | 4.2                  | -3.78                                      | 0.062    | 0.905                    | 5.6  |
|      |       | 25                    | -1.96                                        | 0.07     | 0.92                     | 7.7                | -0.43                                      | 0.074    | 0.918                    | 8.9                  | 0.91                                       | 0.08     | 0.938                    | 9.5  |
|      |       | 50                    | -1.11                                        | 0.065    | 0.935                    | 4.9                | -0.39                                      | 0.068    | 0.932                    | 5.5                  | 0.5                                        | 0.072    | 0.944                    | 5.9  |
| 100  |       | -0.54                 | 0.063                                        | 0.945    | 4.3                      | -0.24              | 0.064                                      | 0.949    | 4.2                      | -0.02                | 0.067                                      | 0.938    | 4.8                      |      |
| 200  |       | -0.42                 | 0.062                                        | 0.945    | 4                        | -0.21              | 0.063                                      | 0.943    | 4                        | -0.22                | 0.064                                      | 0.947    | 4.3                      |      |
| 300  |       | -0.35                 | 0.062                                        | 0.945    | 4                        | -0.22              | 0.062                                      | 0.946    | 3.9                      | -0.25                | 0.063                                      | 0.94     | 4.2                      |      |
| 1000 |       | 0.02                  | 0.045                                        | 0.948    | 2                        | -0.13              | 0.045                                      | 0.946    | 2.1                      | 0.03                 | 0.045                                      | 0.948    | 2                        |      |
| 0.2  |       | 0                     | 0.9                                          | 0.062    | 0.945                    | 3.8                | -2.9                                       | 0.063    | 0.925                    | 4.7                  | -7.43                                      | 0.064    | 0.787                    | 9.8  |
|      |       | 25                    | -2.33                                        | 0.08     | 0.939                    | 9.8                | -0.17                                      | 0.085    | 0.942                    | 9.7                  | 0.65                                       | 0.096    | 0.93                     | 13.3 |
|      |       | 50                    | -0.79                                        | 0.071    | 0.95                     | 5.4                | 0.14                                       | 0.074    | 0.954                    | 6                    | 0.06                                       | 0.081    | 0.939                    | 7.5  |
|      | 100   | -0.33                 | 0.066                                        | 0.955    | 4.4                      | 0.25               | 0.068                                      | 0.95     | 4.7                      | -0.23                | 0.072                                      | 0.95     | 5.3                      |      |
|      | 200   | -0.07                 | 0.064                                        | 0.954    | 4.1                      | 0.27               | 0.065                                      | 0.95     | 4.1                      | -0.35                | 0.068                                      | 0.935    | 4.8                      |      |
|      | 300   | 0                     | 0.063                                        | 0.958    | 4                        | 0.26               | 0.065                                      | 0.955    | 4                        | -0.42                | 0.066                                      | 0.937    | 4.6                      |      |
|      | 1000  | 0.18                  | 0.045                                        | 0.949    | 2                        | 0.19               | 0.045                                      | 0.948    | 2.1                      | -0.12                | 0.045                                      | 0.954    | 1.9                      |      |
|      | 0.3   | 0                     | 0.92                                         | 0.062    | 0.95                     | 4                  | -4.48                                      | 0.064    | 0.911                    | 5.9                  | -10.39                                     | 0.066    | 0.646                    | 15.5 |
|      |       | 25                    | -2                                           | 0.088    | 0.935                    | 10.9               | -0.18                                      | 0.095    | 0.948                    | 11.4                 | 1.78                                       | 0.113    | 0.931                    | 18.7 |
|      |       | 50                    | -0.97                                        | 0.076    | 0.937                    | 6.4                | 0.05                                       | 0.08     | 0.958                    | 6.6                  | 0.65                                       | 0.091    | 0.944                    | 9.2  |
| 100  |       | -0.57                 | 0.07                                         | 0.938    | 5                        | -0.03              | 0.072                                      | 0.962    | 5.1                      | 0.23                 | 0.078                                      | 0.946    | 6.4                      |      |
| 200  |       | -0.41                 | 0.066                                        | 0.945    | 4.4                      | 0.01               | 0.068                                      | 0.957    | 4.3                      | 0.15                 | 0.072                                      | 0.949    | 5.3                      |      |
| 300  |       | -0.35                 | 0.065                                        | 0.953    | 4.2                      | 0.02               | 0.067                                      | 0.956    | 4.1                      | 0                    | 0.069                                      | 0.943    | 4.9                      |      |
| 1000 |       | 0.13                  | 0.045                                        | 0.948    | 2                        | 0.07               | 0.045                                      | 0.955    | 1.9                      | -0.02                | 0.045                                      | 0.94     | 2.1                      |      |

<sup>a</sup>Percent bias =  $\left(\frac{\hat{\beta}-\beta}{\beta}\right) \times 100\%$ .

<sup>b</sup> $\overline{\text{SE}}$ = mean standard error of estimates.

Table 11: Simulation Results when Predictor and Outcome are Sometimes Incorrect (N=100,  $\sigma_u=50$ )

| $p$  | $n_v$ | $\rho_{u,v^*} = -0.5$ |                                              |          |                          | $\rho_{u,v^*} = 0$ |                                            |          |                          | $\rho_{u,v^*} = 0.5$ |                                            |          |                          |
|------|-------|-----------------------|----------------------------------------------|----------|--------------------------|--------------------|--------------------------------------------|----------|--------------------------|----------------------|--------------------------------------------|----------|--------------------------|
|      |       | %-Bias <sup>a</sup>   | $\overline{\text{SE}}^b$<br>( $\times 100$ ) | Coverage | MSE<br>( $\times 10^7$ ) | %-Bias             | $\overline{\text{SE}}$<br>( $\times 100$ ) | Coverage | MSE<br>( $\times 10^7$ ) | %-Bias               | $\overline{\text{SE}}$<br>( $\times 100$ ) | Coverage | MSE<br>( $\times 10^7$ ) |
| 0.05 | 0     | -2.02                 | 0.133                                        | 0.948    | 17                       | -4.46              | 0.136                                      | 0.903    | 23                       | -7.44                | 0.137                                      | 0.88     | 27.5                     |
|      | 25    | -2.67                 | 0.146                                        | 0.933    | 28.6                     | -1.08              | 0.158                                      | 0.927    | 33.9                     | 0.25                 | 0.171                                      | 0.918    | 44.8                     |
|      | 50    | -2.28                 | 0.137                                        | 0.937    | 21.3                     | -0.79              | 0.144                                      | 0.926    | 25.1                     | -0.6                 | 0.149                                      | 0.922    | 28.2                     |
|      | 100   | -0.21                 | 0.101                                        | 0.955    | 10.1                     | -0.09              | 0.101                                      | 0.952    | 9.8                      | -0.34                | 0.101                                      | 0.941    | 11                       |
| 0.1  | 0     | -5.21                 | 0.133                                        | 0.927    | 21.2                     | -8.32              | 0.136                                      | 0.883    | 28.6                     | -13.39               | 0.138                                      | 0.797    | 43.4                     |
|      | 25    | -6.26                 | 0.164                                        | 0.89     | 44.5                     | -1.37              | 0.181                                      | 0.926    | 43.5                     | 1.73                 | 0.201                                      | 0.917    | 63.6                     |
|      | 50    | -3.99                 | 0.146                                        | 0.921    | 25.6                     | -0.67              | 0.156                                      | 0.936    | 26.1                     | 0.63                 | 0.163                                      | 0.936    | 31                       |
|      | 100   | -0.39                 | 0.101                                        | 0.952    | 10.1                     | 0.23               | 0.101                                      | 0.956    | 10.1                     | -0.42                | 0.101                                      | 0.946    | 10.6                     |
| 0.2  | 0     | -8.01                 | 0.13                                         | 0.893    | 25.1                     | -16.29             | 0.135                                      | 0.735    | 49.8                     | -25.49               | 0.14                                       | 0.557    | 91.9                     |
|      | 25    | -5.52                 | 0.187                                        | 0.907    | 54.8                     | -1.97              | 0.217                                      | 0.914    | 67.1                     | 3.21                 | 0.255                                      | 0.932    | 82.9                     |
|      | 50    | -2.25                 | 0.158                                        | 0.941    | 28.3                     | -0.81              | 0.173                                      | 0.941    | 34.2                     | 0.7                  | 0.189                                      | 0.952    | 37.4                     |
|      | 100   | 0.43                  | 0.101                                        | 0.943    | 10.6                     | 0.04               | 0.101                                      | 0.94     | 10.6                     | 0.17                 | 0.101                                      | 0.943    | 10.4                     |
| 0.3  | 0     | -11.33                | 0.127                                        | 0.847    | 29.8                     | -22.61             | 0.135                                      | 0.596    | 72.2                     | -34.31               | 0.141                                      | 0.35     | 142.4                    |
|      | 25    | -3.7                  | 0.207                                        | 0.918    | 53                       | 0.1                | 0.246                                      | 0.914    | 84.5                     | 3.98                 | 0.282                                      | 0.923    | 111.2                    |
|      | 50    | -1.33                 | 0.17                                         | 0.934    | 32.3                     | 0.1                | 0.189                                      | 0.94     | 42.1                     | 1.18                 | 0.205                                      | 0.936    | 49.4                     |
|      | 100   | -0.05                 | 0.101                                        | 0.942    | 10.4                     | 0.04               | 0.101                                      | 0.947    | 10.5                     | -0.29                | 0.101                                      | 0.928    | 10.8                     |

<sup>a</sup>Percent bias =  $\left(\frac{\hat{\beta}-\beta}{\beta}\right) \times 100\%$ .

<sup>b</sup> $\overline{\text{SE}}$ = mean standard error of estimates.

Table 12: Simulation Results when Predictor and Outcome are Sometimes Incorrect (N=100,  $\sigma_u=20$ )

| $p$  | $n_v$ | $\rho_{u,v^*} = -0.5$ |                                              |          |                          | $\rho_{u,v^*} = 0$ |                                            |          |                          | $\rho_{u,v^*} = 0.5$ |                                            |          |                          |
|------|-------|-----------------------|----------------------------------------------|----------|--------------------------|--------------------|--------------------------------------------|----------|--------------------------|----------------------|--------------------------------------------|----------|--------------------------|
|      |       | %-Bias <sup>a</sup>   | $\overline{\text{SE}}^b$<br>( $\times 100$ ) | Coverage | MSE<br>( $\times 10^7$ ) | %-Bias             | $\overline{\text{SE}}$<br>( $\times 100$ ) | Coverage | MSE<br>( $\times 10^7$ ) | %-Bias               | $\overline{\text{SE}}$<br>( $\times 100$ ) | Coverage | MSE<br>( $\times 10^7$ ) |
| 0.05 | 0     | 1.14                  | 0.136                                        | 0.937    | 20.2                     | -1.13              | 0.136                                      | 0.954    | 17.7                     | -2.07                | 0.137                                      | 0.941    | 20.3                     |
|      | 25    | -0.08                 | 0.136                                        | 0.93     | 22.2                     | -0.43              | 0.137                                      | 0.945    | 20.3                     | 0.6                  | 0.139                                      | 0.942    | 22.4                     |
|      | 50    | 0.13                  | 0.133                                        | 0.922    | 20.8                     | -0.45              | 0.134                                      | 0.956    | 18.9                     | 0.18                 | 0.135                                      | 0.939    | 20.5                     |
|      | 100   | 0.46                  | 0.102                                        | 0.937    | 11.1                     | -0.45              | 0.1                                        | 0.965    | 9.7                      | -0.12                | 0.101                                      | 0.934    | 10.7                     |
| 0.1  | 0     | 0.94                  | 0.137                                        | 0.947    | 19.3                     | -1.65              | 0.138                                      | 0.947    | 19.5                     | -3.34                | 0.14                                       | 0.937    | 22.8                     |
|      | 25    | -1.2                  | 0.14                                         | 0.94     | 22.6                     | -0.64              | 0.142                                      | 0.947    | 22                       | 1.07                 | 0.146                                      | 0.937    | 24.7                     |
|      | 50    | -0.35                 | 0.136                                        | 0.948    | 20.3                     | -0.43              | 0.138                                      | 0.949    | 20.1                     | 0.6                  | 0.141                                      | 0.944    | 21.4                     |
|      | 100   | 0.76                  | 0.101                                        | 0.957    | 9.9                      | -0.55              | 0.101                                      | 0.952    | 10.2                     | 0.13                 | 0.101                                      | 0.952    | 10.5                     |
| 0.2  | 0     | 0.91                  | 0.138                                        | 0.948    | 20                       | -2.83              | 0.142                                      | 0.942    | 21.7                     | -6.26                | 0.144                                      | 0.919    | 24.6                     |
|      | 25    | -1.8                  | 0.145                                        | 0.939    | 23.3                     | -0.36              | 0.151                                      | 0.936    | 25.1                     | 2.12                 | 0.159                                      | 0.939    | 29.1                     |
|      | 50    | -0.59                 | 0.14                                         | 0.942    | 21.1                     | 0.09               | 0.144                                      | 0.938    | 22.5                     | 1.24                 | 0.148                                      | 0.946    | 22.4                     |
|      | 100   | 0.22                  | 0.101                                        | 0.94     | 11.1                     | 0.1                | 0.101                                      | 0.942    | 10.6                     | 0.11                 | 0.101                                      | 0.959    | 9.6                      |
| 0.3  | 0     | 0.97                  | 0.14                                         | 0.946    | 20.9                     | -4.42              | 0.144                                      | 0.933    | 23.7                     | -10.03               | 0.148                                      | 0.896    | 32.3                     |
|      | 25    | -2.08                 | 0.151                                        | 0.94     | 27.5                     | -0.02              | 0.159                                      | 0.932    | 28.5                     | 1.72                 | 0.17                                       | 0.933    | 31.3                     |
|      | 50    | -1.09                 | 0.144                                        | 0.938    | 23.1                     | 0.12               | 0.149                                      | 0.931    | 24.3                     | 0.78                 | 0.155                                      | 0.942    | 24.4                     |
|      | 100   | 0.09                  | 0.101                                        | 0.946    | 10.5                     | 0.22               | 0.101                                      | 0.933    | 10.5                     | 0.04                 | 0.101                                      | 0.958    | 9.3                      |

<sup>a</sup>Percent bias =  $\left(\frac{\hat{\beta}-\beta}{\beta}\right) \times 100\%$ .

<sup>b</sup> $\overline{\text{SE}}$ = mean standard error of estimates.

Table 13: Simulation Results when Predictor ( $X$ ) and Outcome ( $Y$ ) are Sometimes Incorrect with always correct Covariate ( $Z$ ) ( $N=1000, \sigma_u=50, \rho_{u,u^*} = -0.5$ )

| $p$  | $n_v$ | $\beta_x$ |                        |          |                          | $\beta_z$ |                       |          |                          |
|------|-------|-----------|------------------------|----------|--------------------------|-----------|-----------------------|----------|--------------------------|
|      |       | %-Bias    | SE<br>( $\times 100$ ) | Coverage | MSE<br>( $\times 10^7$ ) | %-Bias    | SE<br>( $\times 10$ ) | Coverage | MSE<br>( $\times 10^3$ ) |
| 0.05 | 0     | -2.61     | 0.044                  | 0.909    | 2.6                      | -0.38     | 0.225                 | 0.947    | 0.5                      |
|      | 25    | 0.47      | 0.082                  | 0.946    | 12.1                     | 0.09      | 0.261                 | 0.956    | 0.7                      |
|      | 50    | 0.29      | 0.066                  | 0.953    | 5.6                      | 0.06      | 0.241                 | 0.952    | 0.6                      |
|      | 100   | 0.1       | 0.057                  | 0.958    | 3.5                      | 0.03      | 0.232                 | 0.95     | 0.5                      |
|      | 200   | 0.02      | 0.051                  | 0.956    | 2.6                      | 0.02      | 0.228                 | 0.951    | 0.5                      |
|      | 300   | 0.03      | 0.049                  | 0.957    | 2.4                      | 0.02      | 0.227                 | 0.952    | 0.5                      |
|      | 1000  | -0.03     | 0.033                  | 0.951    | 1.1                      | 0         | 0.166                 | 0.954    | 0.3                      |
| 0.1  | 0     | -4.95     | 0.043                  | 0.785    | 4.4                      | -0.72     | 0.227                 | 0.94     | 0.6                      |
|      | 25    | 1.4       | 0.123                  | 0.92     | 26.3                     | 0.22      | 0.309                 | 0.958    | 1.1                      |
|      | 50    | 0.68      | 0.087                  | 0.937    | 9.4                      | 0.12      | 0.261                 | 0.952    | 0.7                      |
|      | 100   | 0.26      | 0.069                  | 0.954    | 4.9                      | 0.06      | 0.242                 | 0.952    | 0.6                      |
|      | 200   | 0.13      | 0.058                  | 0.954    | 3.3                      | 0.04      | 0.234                 | 0.952    | 0.6                      |
|      | 300   | 0.1       | 0.053                  | 0.957    | 2.8                      | 0.03      | 0.231                 | 0.951    | 0.5                      |
|      | 1000  | 0.02      | 0.033                  | 0.949    | 1.1                      | 0.03      | 0.166                 | 0.948    | 0.3                      |
| 0.2  | 0     | -8.97     | 0.042                  | 0.435    | 10                       | -1.36     | 0.232                 | 0.906    | 0.7                      |
|      | 25    | 2.43      | 0.292                  | 0.893    | 131.8                    | 0.34      | 0.536                 | 0.953    | 3.3                      |
|      | 50    | 0.94      | 0.116                  | 0.934    | 15.8                     | 0.13      | 0.292                 | 0.951    | 0.9                      |
|      | 100   | 0.5       | 0.087                  | 0.95     | 8.3                      | 0.06      | 0.261                 | 0.947    | 0.7                      |
|      | 200   | 0.27      | 0.068                  | 0.956    | 4.9                      | 0.03      | 0.246                 | 0.946    | 0.6                      |
|      | 300   | 0.13      | 0.061                  | 0.955    | 3.7                      | 0.01      | 0.241                 | 0.947    | 0.6                      |
|      | 1000  | 0.03      | 0.033                  | 0.953    | 1.1                      | -0.01     | 0.166                 | 0.945    | 0.3                      |
| 0.3  | 0     | -12.45    | 0.042                  | 0.166    | 17.4                     | -1.84     | 0.237                 | 0.872    | 0.9                      |
|      | 25    | 2.74      | 0.237                  | 0.891    | 79                       | 0.43      | 0.455                 | 0.953    | 2.5                      |
|      | 50    | 1.05      | 0.143                  | 0.928    | 23.6                     | 0.19      | 0.324                 | 0.954    | 1.1                      |
|      | 100   | 0.54      | 0.102                  | 0.943    | 11.2                     | 0.1       | 0.279                 | 0.952    | 0.8                      |
|      | 200   | 0.17      | 0.078                  | 0.952    | 6.2                      | 0.05      | 0.257                 | 0.948    | 0.7                      |
|      | 300   | 0.05      | 0.068                  | 0.949    | 4.7                      | 0.03      | 0.25                  | 0.946    | 0.7                      |
|      | 1000  | -0.03     | 0.033                  | 0.948    | 1.1                      | 0.01      | 0.166                 | 0.951    | 0.3                      |



Table 14: Simulation Results when Predictor ( $X$ ) and Outcome ( $Y$ ) are Sometimes Incorrect with always correct Covariate ( $Z$ ) ( $N=1000, \sigma_u=50, \rho_{u,u^*} = 0$ )

| $p$  | $n_v$ | $\beta_x$ |                        |          |                          | $\beta_z$ |                       |          |                          |
|------|-------|-----------|------------------------|----------|--------------------------|-----------|-----------------------|----------|--------------------------|
|      |       | %-Bias    | SE<br>( $\times 100$ ) | Coverage | MSE<br>( $\times 10^7$ ) | %-Bias    | SE<br>( $\times 10$ ) | Coverage | MSE<br>( $\times 10^3$ ) |
| 0.05 | 0     | -5.19     | 0.045                  | 0.77     | 4.9                      | -0.76     | 0.228                 | 0.939    | 0.6                      |
|      | 25    | 0.9       | 0.105                  | 0.891    | 20.7                     | 0.15      | 0.29                  | 0.954    | 0.9                      |
|      | 50    | 0.42      | 0.082                  | 0.922    | 8.6                      | 0.08      | 0.258                 | 0.954    | 0.7                      |
|      | 100   | 0.2       | 0.067                  | 0.941    | 5                        | 0.05      | 0.242                 | 0.956    | 0.6                      |
|      | 200   | 0.06      | 0.057                  | 0.949    | 3.4                      | 0.03      | 0.234                 | 0.954    | 0.5                      |
|      | 300   | 0.04      | 0.053                  | 0.944    | 2.9                      | 0.02      | 0.232                 | 0.952    | 0.5                      |
|      | 1000  | 0.07      | 0.033                  | 0.947    | 1.1                      | 0.01      | 0.166                 | 0.951    | 0.3                      |
| 0.1  | 0     | -9.86     | 0.044                  | 0.408    | 12                       | -1.49     | 0.233                 | 0.904    | 0.8                      |
|      | 25    | 1.61      | 0.161                  | 0.82     | 48.5                     | 0.23      | 0.359                 | 0.947    | 1.6                      |
|      | 50    | 0.8       | 0.112                  | 0.888    | 16.6                     | 0.11      | 0.291                 | 0.953    | 0.9                      |
|      | 100   | 0.41      | 0.085                  | 0.932    | 8.2                      | 0.05      | 0.261                 | 0.951    | 0.7                      |
|      | 200   | 0.24      | 0.068                  | 0.95     | 4.7                      | 0.02      | 0.246                 | 0.95     | 0.6                      |
|      | 300   | 0.13      | 0.06                   | 0.952    | 3.7                      | 0         | 0.241                 | 0.95     | 0.6                      |
|      | 1000  | 0         | 0.033                  | 0.951    | 1.1                      | 0         | 0.166                 | 0.942    | 0.3                      |
| 0.2  | 0     | -18       | 0.044                  | 0.026    | 34.7                     | -2.66     | 0.242                 | 0.804    | 1.3                      |
|      | 25    | 3.95      | 0.279                  | 0.807    | 117.5                    | 0.63      | 0.523                 | 0.946    | 3.3                      |
|      | 50    | 1.21      | 0.158                  | 0.882    | 29.3                     | 0.22      | 0.347                 | 0.956    | 1.2                      |
|      | 100   | 0.74      | 0.114                  | 0.918    | 14.3                     | 0.15      | 0.295                 | 0.956    | 0.9                      |
|      | 200   | 0.39      | 0.085                  | 0.945    | 7.5                      | 0.09      | 0.268                 | 0.95     | 0.7                      |
|      | 300   | 0.23      | 0.073                  | 0.95     | 5.4                      | 0.07      | 0.259                 | 0.949    | 0.7                      |
|      | 1000  | 0         | 0.033                  | 0.946    | 1.1                      | 0.01      | 0.166                 | 0.951    | 0.3                      |
| 0.3  | 0     | -24.84    | 0.044                  | 0.001    | 64.1                     | -3.73     | 0.25                  | 0.686    | 2                        |
|      | 25    | 8.21      | 0.815                  | 0.824    | 971.9                    | 1.25      | 1.462                 | 0.932    | 30.9                     |
|      | 50    | 2.14      | 0.198                  | 0.89     | 45.6                     | 0.32      | 0.399                 | 0.948    | 1.7                      |
|      | 100   | 1.03      | 0.137                  | 0.929    | 19.6                     | 0.15      | 0.325                 | 0.954    | 1.1                      |
|      | 200   | 0.37      | 0.099                  | 0.953    | 9.8                      | 0.05      | 0.288                 | 0.95     | 0.8                      |
|      | 300   | 0.22      | 0.083                  | 0.953    | 6.9                      | 0.03      | 0.275                 | 0.948    | 0.8                      |
|      | 1000  | -0.12     | 0.033                  | 0.947    | 1.1                      | -0.04     | 0.166                 | 0.945    | 0.3                      |

Table 15: Simulation Results when Predictor ( $X$ ) and Outcome ( $Y$ ) are Sometimes Incorrect with always correct Covariate ( $Z$ ) ( $N=1000, \sigma_u=50, \rho_{u,u^*} = 0.5$ )

| $p$  | $n_v$ | $\beta_x$ |                        |          |                          | $\beta_z$ |                       |          |                          |
|------|-------|-----------|------------------------|----------|--------------------------|-----------|-----------------------|----------|--------------------------|
|      |       | %-Bias    | SE<br>( $\times 100$ ) | Coverage | MSE<br>( $\times 10^7$ ) | %-Bias    | SE<br>( $\times 10$ ) | Coverage | MSE<br>( $\times 10^3$ ) |
| 0.05 | 0     | -7.99     | 0.045                  | 0.573    | 8.8                      | -1.17     | 0.231                 | 0.921    | 0.7                      |
|      | 25    | 1.59      | 0.14                   | 0.815    | 49.5                     | 0.26      | 0.338                 | 0.951    | 1.5                      |
|      | 50    | 0.62      | 0.101                  | 0.875    | 16                       | 0.12      | 0.281                 | 0.954    | 0.8                      |
|      | 100   | 0.01      | 0.078                  | 0.918    | 7.3                      | 0.03      | 0.253                 | 0.953    | 0.6                      |
|      | 200   | -0.09     | 0.064                  | 0.941    | 4.4                      | 0.01      | 0.241                 | 0.955    | 0.6                      |
|      | 300   | -0.21     | 0.057                  | 0.941    | 3.5                      | -0.01     | 0.237                 | 0.954    | 0.6                      |
|      | 1000  | -0.14     | 0.033                  | 0.951    | 1.1                      | 0.01      | 0.166                 | 0.952    | 0.3                      |
| 0.1  | 0     | -14.81    | 0.045                  | 0.127    | 24.5                     | -2.22     | 0.238                 | 0.847    | 1.1                      |
|      | 25    | 2.79      | 0.218                  | 0.735    | 98.1                     | 0.43      | 0.441                 | 0.939    | 2.8                      |
|      | 50    | 1.17      | 0.142                  | 0.85     | 28                       | 0.18      | 0.329                 | 0.949    | 1.2                      |
|      | 100   | 0.61      | 0.105                  | 0.922    | 12                       | 0.1       | 0.283                 | 0.951    | 0.8                      |
|      | 200   | 0.29      | 0.079                  | 0.948    | 6.5                      | 0.05      | 0.259                 | 0.949    | 0.7                      |
|      | 300   | 0.18      | 0.069                  | 0.952    | 4.8                      | 0.03      | 0.251                 | 0.948    | 0.6                      |
|      | 1000  | -0.01     | 0.033                  | 0.951    | 1.1                      | -0.01     | 0.166                 | 0.946    | 0.3                      |
| 0.2  | 0     | -26.87    | 0.046                  | 0.001    | 75                       | -4.03     | 0.251                 | 0.634    | 2.3                      |
|      | 25    | 5.24      | 0.355                  | 0.776    | 249.9                    | 0.8       | 0.632                 | 0.921    | 6.7                      |
|      | 50    | 2.36      | 0.205                  | 0.86     | 53.4                     | 0.36      | 0.411                 | 0.942    | 1.8                      |
|      | 100   | 1.16      | 0.143                  | 0.916    | 22.4                     | 0.17      | 0.332                 | 0.953    | 1.1                      |
|      | 200   | 0.55      | 0.103                  | 0.942    | 11                       | 0.08      | 0.291                 | 0.948    | 0.8                      |
|      | 300   | 0.51      | 0.086                  | 0.95     | 7.4                      | 0.07      | 0.277                 | 0.95     | 0.8                      |
|      | 1000  | 0.12      | 0.033                  | 0.952    | 1.1                      | 0.03      | 0.166                 | 0.955    | 0.3                      |
| 0.3  | 0     | -37.21    | 0.046                  | 0        | 141.2                    | -5.56     | 0.261                 | 0.438    | 3.8                      |
|      | 25    | 11.64     | 0.84                   | 0.799    | 1423.9                   | 1.74      | 1.339                 | 0.908    | 33.4                     |
|      | 50    | 4.1       | 0.266                  | 0.871    | 100.2                    | 0.65      | 0.497                 | 0.938    | 3                        |
|      | 100   | 1.28      | 0.173                  | 0.912    | 32.8                     | 0.22      | 0.374                 | 0.951    | 1.5                      |
|      | 200   | 0.54      | 0.122                  | 0.941    | 15.1                     | 0.1       | 0.32                  | 0.951    | 1                        |
|      | 300   | 0.38      | 0.1                    | 0.951    | 9.9                      | 0.08      | 0.301                 | 0.95     | 0.9                      |
|      | 1000  | -0.04     | 0.033                  | 0.949    | 1.1                      | -0.03     | 0.166                 | 0.95     | 0.3                      |

Table 16: Simulation Results when Predictor ( $X$ ) and Outcome ( $Y$ ) are Sometimes Incorrect with always correct Covariate ( $Z$ ) ( $N=1000, \sigma_u=20, \rho_{u,u^*} = -0.5$ )

| $p$  | $n_v$ | $\beta_x$ |                        |          |                          | $\beta_z$ |                       |          |                          |
|------|-------|-----------|------------------------|----------|--------------------------|-----------|-----------------------|----------|--------------------------|
|      |       | %-Bias    | SE<br>( $\times 100$ ) | Coverage | MSE<br>( $\times 10^7$ ) | %-Bias    | SE<br>( $\times 10$ ) | Coverage | MSE<br>( $\times 10^3$ ) |
| 0.05 | 0     | 0.26      | 0.045                  | 0.95     | 2                        | -0.04     | 0.225                 | 0.95     | 0.5                      |
|      | 25    | 0.02      | 0.05                   | 0.95     | 2.6                      | -0.08     | 0.227                 | 0.947    | 0.5                      |
|      | 50    | 0.05      | 0.048                  | 0.947    | 2.3                      | -0.07     | 0.225                 | 0.948    | 0.5                      |
|      | 100   | 0.03      | 0.046                  | 0.948    | 2.2                      | -0.07     | 0.225                 | 0.95     | 0.5                      |
|      | 200   | 0.04      | 0.046                  | 0.949    | 2.1                      | -0.07     | 0.224                 | 0.949    | 0.5                      |
|      | 300   | 0.04      | 0.045                  | 0.948    | 2.1                      | -0.07     | 0.224                 | 0.949    | 0.5                      |
|      | 1000  | 0         | 0.033                  | 0.953    | 1.1                      | -0.03     | 0.166                 | 0.947    | 0.3                      |
| 0.1  | 0     | 0.52      | 0.045                  | 0.947    | 2.1                      | 0.07      | 0.227                 | 0.954    | 0.5                      |
|      | 25    | 0.18      | 0.055                  | 0.953    | 3.3                      | 0.02      | 0.232                 | 0.955    | 0.5                      |
|      | 50    | 0.12      | 0.051                  | 0.953    | 2.7                      | 0.01      | 0.229                 | 0.954    | 0.5                      |
|      | 100   | 0.12      | 0.048                  | 0.948    | 2.4                      | 0.01      | 0.228                 | 0.952    | 0.5                      |
|      | 200   | 0.09      | 0.047                  | 0.947    | 2.3                      | 0.01      | 0.227                 | 0.953    | 0.5                      |
|      | 300   | 0.09      | 0.046                  | 0.949    | 2.2                      | 0.01      | 0.227                 | 0.953    | 0.5                      |
|      | 1000  | 0.03      | 0.033                  | 0.946    | 1.1                      | 0         | 0.166                 | 0.953    | 0.3                      |
| 0.2  | 0     | 0.79      | 0.046                  | 0.947    | 2.1                      | 0.14      | 0.231                 | 0.952    | 0.5                      |
|      | 25    | -0.01     | 0.064                  | 0.957    | 4.6                      | 0.02      | 0.242                 | 0.949    | 0.6                      |
|      | 50    | -0.14     | 0.057                  | 0.953    | 3.3                      | 0         | 0.237                 | 0.948    | 0.6                      |
|      | 100   | -0.07     | 0.052                  | 0.955    | 2.7                      | 0.01      | 0.234                 | 0.949    | 0.6                      |
|      | 200   | -0.08     | 0.049                  | 0.95     | 2.4                      | 0.01      | 0.232                 | 0.949    | 0.5                      |
|      | 300   | -0.07     | 0.048                  | 0.948    | 2.3                      | 0.01      | 0.232                 | 0.95     | 0.5                      |
|      | 1000  | -0.07     | 0.033                  | 0.947    | 1.1                      | 0         | 0.166                 | 0.947    | 0.3                      |
| 0.3  | 0     | 1.2       | 0.046                  | 0.946    | 2.2                      | 0.22      | 0.236                 | 0.946    | 0.6                      |
|      | 25    | -0.06     | 0.073                  | 0.954    | 6                        | 0.03      | 0.252                 | 0.945    | 0.7                      |
|      | 50    | -0.08     | 0.063                  | 0.958    | 4.1                      | 0.03      | 0.244                 | 0.944    | 0.6                      |
|      | 100   | -0.07     | 0.056                  | 0.951    | 3.1                      | 0.03      | 0.24                  | 0.946    | 0.6                      |
|      | 200   | -0.12     | 0.051                  | 0.954    | 2.6                      | 0.02      | 0.237                 | 0.947    | 0.6                      |
|      | 300   | -0.1      | 0.05                   | 0.953    | 2.4                      | 0.02      | 0.237                 | 0.944    | 0.6                      |
|      | 1000  | -0.05     | 0.033                  | 0.947    | 1.1                      | 0.02      | 0.166                 | 0.95     | 0.3                      |

Table 17: Simulation Results when Predictor ( $X$ ) and Outcome ( $Y$ ) are Sometimes Incorrect with always correct Covariate ( $Z$ ) ( $N=1000, \sigma_u=20, \rho_{u,u^*} = 0$ )

| $p$  | $n_v$ | $\beta_x$ |                        |          |                          | $\beta_z$ |                       |          |                          |
|------|-------|-----------|------------------------|----------|--------------------------|-----------|-----------------------|----------|--------------------------|
|      |       | %-Bias    | SE<br>( $\times 100$ ) | Coverage | MSE<br>( $\times 10^7$ ) | %-Bias    | SE<br>( $\times 10$ ) | Coverage | MSE<br>( $\times 10^3$ ) |
| 0.05 | 0     | -0.9      | 0.045                  | 0.94     | 2.2                      | -0.13     | 0.226                 | 0.952    | 0.5                      |
|      | 25    | -0.05     | 0.051                  | 0.951    | 2.9                      | 0         | 0.229                 | 0.955    | 0.5                      |
|      | 50    | -0.03     | 0.049                  | 0.95     | 2.5                      | 0         | 0.227                 | 0.954    | 0.5                      |
|      | 100   | -0.03     | 0.047                  | 0.945    | 2.3                      | 0         | 0.226                 | 0.955    | 0.5                      |
|      | 200   | -0.04     | 0.046                  | 0.944    | 2.2                      | 0         | 0.225                 | 0.954    | 0.5                      |
|      | 300   | -0.04     | 0.046                  | 0.945    | 2.2                      | 0         | 0.225                 | 0.954    | 0.5                      |
|      | 1000  | -0.03     | 0.033                  | 0.946    | 1.2                      | -0.02     | 0.166                 | 0.944    | 0.3                      |
| 0.1  | 0     | -1.76     | 0.046                  | 0.929    | 2.4                      | -0.29     | 0.229                 | 0.947    | 0.5                      |
|      | 25    | 0.06      | 0.058                  | 0.948    | 3.9                      | -0.01     | 0.237                 | 0.948    | 0.6                      |
|      | 50    | 0.07      | 0.054                  | 0.951    | 3.1                      | -0.01     | 0.233                 | 0.947    | 0.5                      |
|      | 100   | 0.03      | 0.05                   | 0.95     | 2.6                      | -0.02     | 0.231                 | 0.947    | 0.5                      |
|      | 200   | 0         | 0.048                  | 0.948    | 2.3                      | -0.02     | 0.23                  | 0.947    | 0.5                      |
|      | 300   | -0.03     | 0.047                  | 0.951    | 2.2                      | -0.03     | 0.229                 | 0.947    | 0.5                      |
|      | 1000  | 0.03      | 0.033                  | 0.948    | 1.1                      | -0.01     | 0.166                 | 0.951    | 0.3                      |
| 0.2  | 0     | -3.33     | 0.047                  | 0.888    | 3.3                      | -0.46     | 0.236                 | 0.949    | 0.6                      |
|      | 25    | 0.21      | 0.071                  | 0.948    | 5.8                      | 0.07      | 0.251                 | 0.952    | 0.6                      |
|      | 50    | 0.18      | 0.062                  | 0.943    | 3.9                      | 0.07      | 0.244                 | 0.954    | 0.6                      |
|      | 100   | 0.16      | 0.055                  | 0.949    | 3                        | 0.06      | 0.24                  | 0.951    | 0.6                      |
|      | 200   | 0.1       | 0.051                  | 0.952    | 2.6                      | 0.05      | 0.238                 | 0.95     | 0.6                      |
|      | 300   | 0.08      | 0.05                   | 0.947    | 2.5                      | 0.05      | 0.237                 | 0.949    | 0.6                      |
|      | 1000  | -0.02     | 0.033                  | 0.947    | 1.1                      | 0.02      | 0.166                 | 0.951    | 0.3                      |
| 0.3  | 0     | -4.94     | 0.047                  | 0.815    | 4.8                      | -0.74     | 0.242                 | 0.939    | 0.7                      |
|      | 25    | 0.14      | 0.081                  | 0.941    | 7.7                      | 0.02      | 0.264                 | 0.947    | 0.7                      |
|      | 50    | 0.08      | 0.068                  | 0.949    | 4.9                      | 0.01      | 0.254                 | 0.948    | 0.7                      |
|      | 100   | 0.1       | 0.06                   | 0.952    | 3.6                      | 0.02      | 0.248                 | 0.949    | 0.6                      |
|      | 200   | 0.1       | 0.054                  | 0.946    | 3                        | 0.02      | 0.245                 | 0.948    | 0.6                      |
|      | 300   | 0.09      | 0.052                  | 0.946    | 2.8                      | 0.02      | 0.244                 | 0.947    | 0.6                      |
|      | 1000  | -0.01     | 0.033                  | 0.947    | 1.1                      | 0.01      | 0.166                 | 0.951    | 0.3                      |

Table 18: Simulation Results when Predictor ( $X$ ) and Outcome ( $Y$ ) are Sometimes Incorrect with always correct Covariate ( $Z$ ) ( $N=1000, \sigma_u=20, \rho_{u,u^*} = 0.5$ )

| $p$  | $n_v$ | $\beta_x$ |                        |          |                          | $\beta_z$ |                       |          |                          |
|------|-------|-----------|------------------------|----------|--------------------------|-----------|-----------------------|----------|--------------------------|
|      |       | %-Bias    | SE<br>( $\times 100$ ) | Coverage | MSE<br>( $\times 10^7$ ) | %-Bias    | SE<br>( $\times 10$ ) | Coverage | MSE<br>( $\times 10^3$ ) |
| 0.05 | 0     | -1.94     | 0.045                  | 0.925    | 2.5                      | -0.31     | 0.227                 | 0.95     | 0.5                      |
|      | 25    | 0.05      | 0.055                  | 0.951    | 3.6                      | -0.01     | 0.233                 | 0.949    | 0.6                      |
|      | 50    | 0.06      | 0.052                  | 0.95     | 2.9                      | -0.01     | 0.23                  | 0.95     | 0.5                      |
|      | 100   | 0.05      | 0.049                  | 0.955    | 2.5                      | -0.01     | 0.228                 | 0.95     | 0.5                      |
|      | 200   | 0.04      | 0.047                  | 0.953    | 2.3                      | -0.01     | 0.227                 | 0.948    | 0.5                      |
|      | 300   | 0.01      | 0.046                  | 0.954    | 2.2                      | -0.01     | 0.227                 | 0.949    | 0.5                      |
|      | 1000  | 0.05      | 0.033                  | 0.951    | 1.1                      | -0.02     | 0.166                 | 0.95     | 0.3                      |
| 0.1  | 0     | -3.9      | 0.046                  | 0.866    | 3.7                      | -0.61     | 0.232                 | 0.944    | 0.6                      |
|      | 25    | 0.17      | 0.066                  | 0.938    | 5.2                      | 0         | 0.245                 | 0.953    | 0.6                      |
|      | 50    | 0.04      | 0.058                  | 0.945    | 3.6                      | -0.02     | 0.238                 | 0.955    | 0.6                      |
|      | 100   | 0.05      | 0.053                  | 0.948    | 2.9                      | -0.01     | 0.235                 | 0.952    | 0.5                      |
|      | 200   | 0.01      | 0.05                   | 0.953    | 2.5                      | -0.02     | 0.233                 | 0.954    | 0.5                      |
|      | 300   | -0.01     | 0.048                  | 0.951    | 2.3                      | -0.02     | 0.232                 | 0.953    | 0.5                      |
|      | 1000  | 0.04      | 0.033                  | 0.949    | 1.1                      | -0.03     | 0.166                 | 0.95     | 0.3                      |
| 0.2  | 0     | -7.56     | 0.047                  | 0.64     | 8.1                      | -1.12     | 0.241                 | 0.92     | 0.7                      |
|      | 25    | 0.35      | 0.084                  | 0.914    | 8.9                      | 0.06      | 0.266                 | 0.947    | 0.7                      |
|      | 50    | 0.14      | 0.07                   | 0.936    | 5.4                      | 0.03      | 0.254                 | 0.948    | 0.7                      |
|      | 100   | 0.17      | 0.06                   | 0.943    | 3.9                      | 0.04      | 0.247                 | 0.947    | 0.6                      |
|      | 200   | 0.13      | 0.054                  | 0.94     | 3.1                      | 0.03      | 0.244                 | 0.95     | 0.6                      |
|      | 300   | 0.12      | 0.052                  | 0.939    | 2.9                      | 0.03      | 0.242                 | 0.95     | 0.6                      |
|      | 1000  | 0.01      | 0.033                  | 0.953    | 1.1                      | 0.01      | 0.166                 | 0.95     | 0.3                      |
| 0.3  | 0     | -11.27    | 0.049                  | 0.369    | 15.3                     | -1.74     | 0.249                 | 0.891    | 0.9                      |
|      | 25    | 0.36      | 0.098                  | 0.912    | 11.7                     | 0.01      | 0.285                 | 0.948    | 0.9                      |
|      | 50    | 0.08      | 0.079                  | 0.938    | 6.7                      | -0.04     | 0.268                 | 0.948    | 0.7                      |
|      | 100   | 0.05      | 0.067                  | 0.952    | 4.5                      | -0.04     | 0.258                 | 0.946    | 0.7                      |
|      | 200   | 0.07      | 0.058                  | 0.947    | 3.5                      | -0.04     | 0.253                 | 0.944    | 0.7                      |
|      | 300   | 0.06      | 0.055                  | 0.946    | 3.1                      | -0.04     | 0.252                 | 0.941    | 0.7                      |
|      | 1000  | 0.01      | 0.033                  | 0.946    | 1.1                      | -0.02     | 0.166                 | 0.946    | 0.3                      |

Table 19: Simulation Results when Predictor ( $X$ ) and Outcome ( $Y$ ) are Sometimes Incorrect with always correct Covariate ( $Z$ ) ( $N=500, \sigma_u=50, \rho_{u,u^*} = -0.5$ )

| $p$  | $n_v$ | $\beta_x$ |                        |          |                          | $\beta_z$ |                       |          |                          |
|------|-------|-----------|------------------------|----------|--------------------------|-----------|-----------------------|----------|--------------------------|
|      |       | %-Bias    | SE<br>( $\times 100$ ) | Coverage | MSE<br>( $\times 10^7$ ) | %-Bias    | SE<br>( $\times 10$ ) | Coverage | MSE<br>( $\times 10^3$ ) |
| 0.05 | 0     | -2.66     | 0.062                  | 0.926    | 4.7                      | -0.34     | 0.319                 | 0.947    | 1.1                      |
|      | 25    | 0.41      | 0.096                  | 0.949    | 13.1                     | 0.12      | 0.346                 | 0.949    | 1.3                      |
|      | 50    | 0.15      | 0.081                  | 0.949    | 7.2                      | 0.08      | 0.329                 | 0.948    | 1.1                      |
|      | 100   | 0.1       | 0.073                  | 0.948    | 5.4                      | 0.07      | 0.322                 | 0.945    | 1.1                      |
|      | 200   | 0.02      | 0.068                  | 0.95     | 4.6                      | 0.06      | 0.319                 | 0.945    | 1.1                      |
|      | 300   | -0.02     | 0.066                  | 0.951    | 4.3                      | 0.05      | 0.318                 | 0.945    | 1                        |
|      | 1000  | -0.06     | 0.047                  | 0.955    | 2.1                      | 0.03      | 0.235                 | 0.954    | 0.5                      |
| 0.1  | 0     | -5.15     | 0.061                  | 0.858    | 6.7                      | -0.8      | 0.322                 | 0.943    | 1.1                      |
|      | 25    | 1.06      | 0.131                  | 0.936    | 25.5                     | 0.13      | 0.385                 | 0.953    | 1.5                      |
|      | 50    | 0.26      | 0.098                  | 0.947    | 11                       | 0.02      | 0.345                 | 0.951    | 1.2                      |
|      | 100   | 0.02      | 0.081                  | 0.949    | 7                        | -0.02     | 0.331                 | 0.949    | 1.1                      |
|      | 200   | -0.16     | 0.072                  | 0.947    | 5.3                      | -0.05     | 0.325                 | 0.948    | 1.1                      |
|      | 300   | -0.2      | 0.069                  | 0.947    | 4.8                      | -0.05     | 0.324                 | 0.95     | 1                        |
|      | 1000  | -0.18     | 0.047                  | 0.952    | 2.2                      | -0.06     | 0.235                 | 0.951    | 0.5                      |
| 0.2  | 0     | -8.99     | 0.06                   | 0.665    | 12.2                     | -1.34     | 0.328                 | 0.928    | 1.3                      |
|      | 25    | 2.14      | 0.191                  | 0.927    | 47.3                     | 0.32      | 0.454                 | 0.956    | 2                        |
|      | 50    | 0.73      | 0.126                  | 0.947    | 17.7                     | 0.12      | 0.374                 | 0.952    | 1.4                      |
|      | 100   | 0.26      | 0.097                  | 0.952    | 9.8                      | 0.05      | 0.348                 | 0.945    | 1.2                      |
|      | 200   | 0.16      | 0.081                  | 0.948    | 6.8                      | 0.03      | 0.337                 | 0.944    | 1.2                      |
|      | 300   | 0.1       | 0.075                  | 0.946    | 5.8                      | 0.02      | 0.333                 | 0.944    | 1.2                      |
|      | 1000  | -0.02     | 0.047                  | 0.95     | 2.2                      | -0.02     | 0.235                 | 0.945    | 0.6                      |
| 0.3  | 0     | -12.38    | 0.059                  | 0.444    | 19.2                     | -1.92     | 0.335                 | 0.901    | 1.5                      |
|      | 25    | 0.54      | 2.821                  | 0.922    | 3710.2                   | -0.05     | 5.173                 | 0.95     | 123.6                    |
|      | 50    | 0.98      | 0.149                  | 0.945    | 24.5                     | 0.08      | 0.402                 | 0.948    | 1.7                      |
|      | 100   | 0.33      | 0.111                  | 0.951    | 12.6                     | -0.02     | 0.365                 | 0.945    | 1.4                      |
|      | 200   | 0.23      | 0.089                  | 0.953    | 7.9                      | -0.03     | 0.349                 | 0.944    | 1.3                      |
|      | 300   | 0.19      | 0.08                   | 0.946    | 6.5                      | -0.04     | 0.344                 | 0.946    | 1.2                      |
|      | 1000  | -0.07     | 0.047                  | 0.948    | 2.2                      | -0.04     | 0.235                 | 0.949    | 0.6                      |

Table 20: Simulation Results when Predictor ( $X$ ) and Outcome ( $Y$ ) are Sometimes Incorrect with always correct Covariate ( $Z$ ) ( $N=500, \sigma_u=50, \rho_{u,u^*} = 0$ )

| $p$  | $n_v$ | $\beta_x$ |                        |          |                          | $\beta_z$ |                       |          |                          |
|------|-------|-----------|------------------------|----------|--------------------------|-----------|-----------------------|----------|--------------------------|
|      |       | %-Bias    | SE<br>( $\times 100$ ) | Coverage | MSE<br>( $\times 10^7$ ) | %-Bias    | SE<br>( $\times 10$ ) | Coverage | MSE<br>( $\times 10^3$ ) |
| 0.05 | 0     | -5.14     | 0.063                  | 0.85     | 7.3                      | -0.8      | 0.323                 | 0.945    | 1.1                      |
|      | 25    | 1.31      | 0.124                  | 0.926    | 26                       | 0.17      | 0.381                 | 0.956    | 1.6                      |
|      | 50    | 0.51      | 0.095                  | 0.943    | 10.7                     | 0.05      | 0.344                 | 0.953    | 1.2                      |
|      | 100   | 0.26      | 0.081                  | 0.952    | 6.9                      | 0.01      | 0.331                 | 0.949    | 1.1                      |
|      | 200   | 0.17      | 0.072                  | 0.944    | 5.4                      | 0         | 0.325                 | 0.949    | 1.1                      |
|      | 300   | 0.12      | 0.068                  | 0.944    | 4.9                      | -0.01     | 0.324                 | 0.949    | 1.1                      |
|      | 1000  | 0.04      | 0.047                  | 0.948    | 2.3                      | -0.01     | 0.235                 | 0.946    | 0.6                      |
| 0.1  | 0     | -9.84     | 0.063                  | 0.648    | 14.1                     | -1.34     | 0.33                  | 0.932    | 1.3                      |
|      | 25    | 2.29      | 0.173                  | 0.888    | 49.8                     | 0.48      | 0.441                 | 0.956    | 2.1                      |
|      | 50    | 0.98      | 0.123                  | 0.926    | 18.3                     | 0.29      | 0.375                 | 0.953    | 1.4                      |
|      | 100   | 0.38      | 0.096                  | 0.951    | 9.6                      | 0.2       | 0.349                 | 0.95     | 1.2                      |
|      | 200   | 0.11      | 0.079                  | 0.953    | 6.4                      | 0.16      | 0.337                 | 0.944    | 1.2                      |
|      | 300   | 0.07      | 0.073                  | 0.95     | 5.3                      | 0.15      | 0.333                 | 0.946    | 1.1                      |
|      | 1000  | 0         | 0.047                  | 0.952    | 2.2                      | 0.1       | 0.235                 | 0.951    | 0.6                      |
| 0.2  | 0     | -17.92    | 0.063                  | 0.199    | 36.7                     | -2.65     | 0.343                 | 0.875    | 1.9                      |
|      | 25    | 5.31      | 0.302                  | 0.854    | 149.6                    | 0.84      | 0.611                 | 0.952    | 4.5                      |
|      | 50    | 1.7       | 0.168                  | 0.918    | 33.7                     | 0.31      | 0.43                  | 0.951    | 1.9                      |
|      | 100   | 0.87      | 0.122                  | 0.944    | 15.9                     | 0.18      | 0.381                 | 0.947    | 1.5                      |
|      | 200   | 0.51      | 0.094                  | 0.95     | 9.1                      | 0.13      | 0.359                 | 0.946    | 1.3                      |
|      | 300   | 0.29      | 0.082                  | 0.948    | 6.9                      | 0.09      | 0.352                 | 0.944    | 1.3                      |
|      | 1000  | -0.01     | 0.047                  | 0.951    | 2.2                      | 0.02      | 0.235                 | 0.945    | 0.6                      |
| 0.3  | 0     | -24.83    | 0.062                  | 0.033    | 66.4                     | -3.7      | 0.354                 | 0.813    | 2.7                      |
|      | 25    | 7.03      | 0.478                  | 0.86     | 455.9                    | 1.07      | 0.88                  | 0.947    | 12.5                     |
|      | 50    | 2.49      | 0.207                  | 0.909    | 54.1                     | 0.38      | 0.481                 | 0.957    | 2.5                      |
|      | 100   | 1.11      | 0.143                  | 0.942    | 21.7                     | 0.18      | 0.411                 | 0.949    | 1.7                      |
|      | 200   | 0.36      | 0.105                  | 0.952    | 11.2                     | 0.07      | 0.38                  | 0.944    | 1.5                      |
|      | 300   | 0.17      | 0.091                  | 0.951    | 8.4                      | 0.04      | 0.37                  | 0.945    | 1.4                      |
|      | 1000  | -0.06     | 0.047                  | 0.951    | 2.3                      | -0.03     | 0.235                 | 0.946    | 0.6                      |

Table 21: Simulation Results when Predictor ( $X$ ) and Outcome ( $Y$ ) are Sometimes Incorrect with always correct Covariate ( $Z$ ) ( $N=500, \sigma_u=50, \rho_{u,u^*} = 0.5$ )

| $p$  | $n_v$ | $\beta_x$ |                        |          |                          | $\beta_z$ |                       |          |                          |
|------|-------|-----------|------------------------|----------|--------------------------|-----------|-----------------------|----------|--------------------------|
|      |       | %-Bias    | SE<br>( $\times 100$ ) | Coverage | MSE<br>( $\times 10^7$ ) | %-Bias    | SE<br>( $\times 10$ ) | Coverage | MSE<br>( $\times 10^3$ ) |
| 0.05 | 0     | -7.8      | 0.064                  | 0.752    | 10.7                     | -1.2      | 0.327                 | 0.937    | 1.2                      |
|      | 25    | 2.02      | 0.197                  | 0.895    | 147.2                    | 0.26      | 0.472                 | 0.954    | 3.4                      |
|      | 50    | 0.86      | 0.113                  | 0.934    | 16.9                     | 0.1       | 0.364                 | 0.957    | 1.3                      |
|      | 100   | 0.29      | 0.09                   | 0.947    | 8.7                      | 0.01      | 0.341                 | 0.957    | 1.2                      |
|      | 200   | 0.06      | 0.076                  | 0.952    | 5.8                      | -0.02     | 0.332                 | 0.955    | 1.1                      |
|      | 300   | 0.05      | 0.071                  | 0.953    | 4.9                      | -0.02     | 0.329                 | 0.956    | 1.1                      |
|      | 1000  | -0.07     | 0.047                  | 0.955    | 2.1                      | -0.04     | 0.235                 | 0.952    | 0.5                      |
| 0.1  | 0     | -14.91    | 0.064                  | 0.38     | 27.7                     | -2.28     | 0.337                 | 0.889    | 1.7                      |
|      | 25    | 2.76      | 0.218                  | 0.828    | 84.5                     | 0.36      | 0.499                 | 0.946    | 3                        |
|      | 50    | 1.12      | 0.15                   | 0.9      | 29.7                     | 0.12      | 0.407                 | 0.949    | 1.8                      |
|      | 100   | 0.39      | 0.112                  | 0.934    | 13.7                     | 0.02      | 0.367                 | 0.948    | 1.4                      |
|      | 200   | 0.16      | 0.088                  | 0.952    | 8.1                      | -0.02     | 0.348                 | 0.945    | 1.3                      |
|      | 300   | 0.08      | 0.078                  | 0.943    | 6.5                      | -0.03     | 0.342                 | 0.946    | 1.2                      |
|      | 1000  | -0.06     | 0.047                  | 0.953    | 2.2                      | 0.03      | 0.235                 | 0.945    | 0.6                      |
| 0.2  | 0     | -26.78    | 0.065                  | 0.032    | 77.3                     | -4.07     | 0.355                 | 0.785    | 2.9                      |
|      | 25    | 3.33      | 3.991                  | 0.806    | 8718                     | 0.44      | 5.922                 | 0.938    | 182.6                    |
|      | 50    | 2.9       | 0.214                  | 0.895    | 58.4                     | 0.39      | 0.492                 | 0.95     | 2.6                      |
|      | 100   | 1.27      | 0.148                  | 0.938    | 23.9                     | 0.14      | 0.417                 | 0.948    | 1.8                      |
|      | 200   | 0.54      | 0.108                  | 0.948    | 11.9                     | 0.03      | 0.382                 | 0.944    | 1.5                      |
|      | 300   | 0.48      | 0.091                  | 0.952    | 8.5                      | 0.02      | 0.371                 | 0.943    | 1.4                      |
|      | 1000  | 0.07      | 0.047                  | 0.95     | 2.2                      | 0         | 0.235                 | 0.953    | 0.6                      |
| 0.3  | 0     | -37.14    | 0.065                  | 0.001    | 143.3                    | -5.55     | 0.37                  | 0.671    | 4.5                      |
|      | 25    | 9.48      | 0.53                   | 0.82     | 448.2                    | 1.45      | 0.936                 | 0.944    | 10.8                     |
|      | 50    | 3.16      | 0.259                  | 0.886    | 79.6                     | 0.53      | 0.557                 | 0.957    | 3.1                      |
|      | 100   | 1.6       | 0.176                  | 0.939    | 33.9                     | 0.29      | 0.46                  | 0.956    | 2.1                      |
|      | 200   | 0.83      | 0.124                  | 0.955    | 15.9                     | 0.17      | 0.413                 | 0.956    | 1.7                      |
|      | 300   | 0.53      | 0.102                  | 0.951    | 10.9                     | 0.12      | 0.398                 | 0.952    | 1.6                      |
|      | 1000  | 0.04      | 0.047                  | 0.947    | 2.2                      | -0.04     | 0.235                 | 0.95     | 0.5                      |



Table 22: Simulation Results when Predictor ( $X$ ) and Outcome ( $Y$ ) are Sometimes Incorrect with always correct Covariate ( $Z$ ) ( $N=500, \sigma_u=20, \rho_{u,u^*} = -0.5$ )

| $p$  | $n_v$ | $\beta_x$ |                        |          |                          | $\beta_z$ |                       |          |                          |
|------|-------|-----------|------------------------|----------|--------------------------|-----------|-----------------------|----------|--------------------------|
|      |       | %-Bias    | SE<br>( $\times 100$ ) | Coverage | MSE<br>( $\times 10^7$ ) | %-Bias    | SE<br>( $\times 10$ ) | Coverage | MSE<br>( $\times 10^3$ ) |
| 0.05 | 0     | 0.05      | 0.063                  | 0.949    | 4.1                      | -0.03     | 0.319                 | 0.946    | 1                        |
|      | 25    | -0.13     | 0.067                  | 0.948    | 4.8                      | -0.06     | 0.319                 | 0.947    | 1                        |
|      | 50    | -0.16     | 0.065                  | 0.945    | 4.5                      | -0.06     | 0.318                 | 0.946    | 1                        |
|      | 100   | -0.14     | 0.064                  | 0.944    | 4.3                      | -0.06     | 0.317                 | 0.946    | 1                        |
|      | 200   | -0.16     | 0.064                  | 0.943    | 4.2                      | -0.06     | 0.317                 | 0.945    | 1                        |
|      | 300   | -0.17     | 0.063                  | 0.945    | 4.2                      | -0.06     | 0.317                 | 0.945    | 1                        |
|      | 1000  | -0.1      | 0.047                  | 0.957    | 2.1                      | -0.05     | 0.235                 | 0.949    | 0.6                      |
| 0.1  | 0     | 0.43      | 0.064                  | 0.948    | 4.1                      | -0.01     | 0.322                 | 0.951    | 1                        |
|      | 25    | 0.07      | 0.072                  | 0.948    | 5.5                      | -0.06     | 0.324                 | 0.948    | 1.1                      |
|      | 50    | 0.05      | 0.069                  | 0.946    | 4.9                      | -0.07     | 0.322                 | 0.947    | 1                        |
|      | 100   | 0.03      | 0.066                  | 0.947    | 4.5                      | -0.07     | 0.32                  | 0.949    | 1                        |
|      | 200   | 0.02      | 0.065                  | 0.945    | 4.3                      | -0.07     | 0.32                  | 0.948    | 1                        |
|      | 300   | 0.02      | 0.065                  | 0.945    | 4.3                      | -0.07     | 0.32                  | 0.949    | 1                        |
|      | 1000  | 0.02      | 0.047                  | 0.948    | 2.2                      | -0.05     | 0.235                 | 0.951    | 0.5                      |
| 0.2  | 0     | 0.82      | 0.065                  | 0.943    | 4.4                      | 0.08      | 0.328                 | 0.95     | 1.1                      |
|      | 25    | -0.04     | 0.08                   | 0.949    | 7                        | -0.04     | 0.334                 | 0.948    | 1.2                      |
|      | 50    | -0.01     | 0.073                  | 0.95     | 5.6                      | -0.04     | 0.33                  | 0.949    | 1.1                      |
|      | 100   | -0.01     | 0.069                  | 0.949    | 5                        | -0.04     | 0.327                 | 0.947    | 1.1                      |
|      | 200   | -0.01     | 0.067                  | 0.947    | 4.6                      | -0.04     | 0.326                 | 0.947    | 1.1                      |
|      | 300   | -0.01     | 0.066                  | 0.947    | 4.5                      | -0.04     | 0.326                 | 0.948    | 1.1                      |
|      | 1000  | -0.05     | 0.047                  | 0.954    | 2.2                      | -0.02     | 0.235                 | 0.952    | 0.5                      |
| 0.3  | 0     | 1.3       | 0.065                  | 0.945    | 4.5                      | 0.05      | 0.333                 | 0.947    | 1.1                      |
|      | 25    | 0.05      | 0.088                  | 0.952    | 8.5                      | -0.13     | 0.344                 | 0.945    | 1.2                      |
|      | 50    | 0.16      | 0.078                  | 0.952    | 6.4                      | -0.12     | 0.337                 | 0.946    | 1.2                      |
|      | 100   | 0.12      | 0.072                  | 0.951    | 5.3                      | -0.12     | 0.334                 | 0.946    | 1.2                      |
|      | 200   | 0.06      | 0.069                  | 0.951    | 4.8                      | -0.13     | 0.333                 | 0.945    | 1.1                      |
|      | 300   | 0.06      | 0.068                  | 0.952    | 4.7                      | -0.13     | 0.332                 | 0.946    | 1.1                      |
|      | 1000  | -0.01     | 0.047                  | 0.952    | 2.2                      | -0.08     | 0.235                 | 0.95     | 0.6                      |

Table 23: Simulation Results when Predictor ( $X$ ) and Outcome ( $Y$ ) are Sometimes Incorrect with always correct Covariate ( $Z$ ) ( $N=500, \sigma_u=20, \rho_{u,u^*} = 0$ )

| $p$  | $n_v$ | $\beta_x$ |                        |          |                          | $\beta_z$ |                       |          |                          |
|------|-------|-----------|------------------------|----------|--------------------------|-----------|-----------------------|----------|--------------------------|
|      |       | %-Bias    | SE<br>( $\times 100$ ) | Coverage | MSE<br>( $\times 10^7$ ) | %-Bias    | SE<br>( $\times 10$ ) | Coverage | MSE<br>( $\times 10^3$ ) |
| 0.05 | 0     | -0.87     | 0.064                  | 0.951    | 4.1                      | -0.16     | 0.32                  | 0.951    | 1                        |
|      | 25    | 0.06      | 0.069                  | 0.951    | 4.9                      | -0.02     | 0.32                  | 0.949    | 1                        |
|      | 50    | 0.05      | 0.067                  | 0.953    | 4.4                      | -0.02     | 0.319                 | 0.949    | 1                        |
|      | 100   | 0.06      | 0.065                  | 0.95     | 4.2                      | -0.02     | 0.318                 | 0.948    | 1                        |
|      | 200   | 0.01      | 0.064                  | 0.947    | 4.1                      | -0.03     | 0.318                 | 0.948    | 1                        |
|      | 300   | 0.02      | 0.064                  | 0.95     | 4.1                      | -0.02     | 0.318                 | 0.948    | 1                        |
|      | 1000  | 0.01      | 0.047                  | 0.949    | 2.2                      | 0.01      | 0.235                 | 0.955    | 0.5                      |
| 0.1  | 0     | -1.83     | 0.065                  | 0.94     | 4.5                      | -0.3      | 0.325                 | 0.953    | 1                        |
|      | 25    | -0.02     | 0.075                  | 0.949    | 6                        | -0.03     | 0.33                  | 0.953    | 1.1                      |
|      | 50    | -0.07     | 0.07                   | 0.944    | 5.1                      | -0.04     | 0.326                 | 0.954    | 1                        |
|      | 100   | -0.07     | 0.067                  | 0.949    | 4.6                      | -0.04     | 0.325                 | 0.952    | 1                        |
|      | 200   | -0.07     | 0.066                  | 0.947    | 4.4                      | -0.04     | 0.324                 | 0.953    | 1                        |
|      | 300   | -0.07     | 0.065                  | 0.948    | 4.3                      | -0.04     | 0.324                 | 0.952    | 1                        |
|      | 1000  | 0.02      | 0.047                  | 0.955    | 2.2                      | -0.02     | 0.235                 | 0.951    | 0.5                      |
| 0.2  | 0     | -3.38     | 0.066                  | 0.919    | 5.5                      | -0.48     | 0.334                 | 0.951    | 1.1                      |
|      | 25    | 0.23      | 0.087                  | 0.951    | 8.5                      | 0.06      | 0.345                 | 0.95     | 1.2                      |
|      | 50    | 0.19      | 0.078                  | 0.949    | 6.3                      | 0.05      | 0.339                 | 0.954    | 1.1                      |
|      | 100   | 0.07      | 0.072                  | 0.944    | 5.4                      | 0.03      | 0.335                 | 0.954    | 1.1                      |
|      | 200   | 0.05      | 0.069                  | 0.944    | 4.8                      | 0.03      | 0.334                 | 0.952    | 1.1                      |
|      | 300   | 0.03      | 0.068                  | 0.946    | 4.7                      | 0.03      | 0.333                 | 0.952    | 1.1                      |
|      | 1000  | -0.05     | 0.047                  | 0.951    | 2.2                      | 0.03      | 0.235                 | 0.95     | 0.5                      |
| 0.3  | 0     | -4.92     | 0.067                  | 0.888    | 7                        | -0.7      | 0.344                 | 0.947    | 1.2                      |
|      | 25    | 0.24      | 0.096                  | 0.951    | 10.4                     | 0.08      | 0.359                 | 0.95     | 1.3                      |
|      | 50    | 0.15      | 0.084                  | 0.95     | 7.3                      | 0.06      | 0.35                  | 0.948    | 1.2                      |
|      | 100   | 0.1       | 0.076                  | 0.947    | 5.9                      | 0.05      | 0.346                 | 0.946    | 1.2                      |
|      | 200   | 0.06      | 0.072                  | 0.945    | 5.3                      | 0.05      | 0.344                 | 0.946    | 1.2                      |
|      | 300   | 0.08      | 0.07                   | 0.943    | 5                        | 0.05      | 0.343                 | 0.946    | 1.2                      |
|      | 1000  | 0.08      | 0.047                  | 0.948    | 2.2                      | 0.01      | 0.236                 | 0.948    | 0.6                      |

Table 24: Simulation Results when Predictor ( $X$ ) and Outcome ( $Y$ ) are Sometimes Incorrect with always correct Covariate ( $Z$ ) ( $N=500, \sigma_u=20, \rho_{u,u^*} = 0.5$ )

| $p$  | $n_v$ | $\beta_x$ |                        |          |                          | $\beta_z$ |                       |          |                          |
|------|-------|-----------|------------------------|----------|--------------------------|-----------|-----------------------|----------|--------------------------|
|      |       | %-Bias    | SE<br>( $\times 100$ ) | Coverage | MSE<br>( $\times 10^7$ ) | %-Bias    | SE<br>( $\times 10$ ) | Coverage | MSE<br>( $\times 10^3$ ) |
| 0.05 | 0     | -1.81     | 0.064                  | 0.943    | 4.4                      | -0.26     | 0.322                 | 0.944    | 1.1                      |
|      | 25    | 0.27      | 0.072                  | 0.948    | 5.8                      | 0.05      | 0.324                 | 0.942    | 1.1                      |
|      | 50    | 0.21      | 0.069                  | 0.948    | 4.8                      | 0.04      | 0.321                 | 0.943    | 1.1                      |
|      | 100   | 0.22      | 0.066                  | 0.947    | 4.4                      | 0.04      | 0.32                  | 0.942    | 1.1                      |
|      | 200   | 0.17      | 0.065                  | 0.949    | 4.2                      | 0.03      | 0.319                 | 0.942    | 1.1                      |
|      | 300   | 0.17      | 0.064                  | 0.95     | 4.1                      | 0.03      | 0.319                 | 0.942    | 1.1                      |
|      | 1000  | 0.14      | 0.047                  | 0.952    | 2.1                      | 0.01      | 0.235                 | 0.944    | 0.6                      |
| 0.1  | 0     | -3.95     | 0.065                  | 0.907    | 5.9                      | -0.61     | 0.328                 | 0.944    | 1.1                      |
|      | 25    | -0.07     | 0.081                  | 0.95     | 7.2                      | -0.03     | 0.336                 | 0.949    | 1.1                      |
|      | 50    | -0.05     | 0.074                  | 0.951    | 5.6                      | -0.03     | 0.331                 | 0.949    | 1.1                      |
|      | 100   | -0.03     | 0.07                   | 0.948    | 4.9                      | -0.02     | 0.328                 | 0.947    | 1.1                      |
|      | 200   | -0.04     | 0.067                  | 0.947    | 4.5                      | -0.03     | 0.327                 | 0.946    | 1.1                      |
|      | 300   | -0.05     | 0.066                  | 0.947    | 4.4                      | -0.03     | 0.326                 | 0.946    | 1.1                      |
|      | 1000  | -0.05     | 0.047                  | 0.952    | 2.2                      | -0.01     | 0.235                 | 0.945    | 0.6                      |
| 0.2  | 0     | -7.46     | 0.067                  | 0.794    | 10.2                     | -1.15     | 0.341                 | 0.935    | 1.3                      |
|      | 25    | 0.27      | 0.097                  | 0.939    | 10.9                     | 0.01      | 0.358                 | 0.949    | 1.3                      |
|      | 50    | 0.17      | 0.084                  | 0.949    | 7.5                      | 0         | 0.348                 | 0.947    | 1.2                      |
|      | 100   | 0.2       | 0.076                  | 0.951    | 6                        | 0         | 0.343                 | 0.948    | 1.2                      |
|      | 200   | 0.2       | 0.071                  | 0.947    | 5.2                      | 0         | 0.34                  | 0.948    | 1.2                      |
|      | 300   | 0.21      | 0.07                   | 0.943    | 4.9                      | 0         | 0.34                  | 0.947    | 1.2                      |
|      | 1000  | 0.03      | 0.047                  | 0.946    | 2.2                      | 0.02      | 0.235                 | 0.95     | 0.6                      |
| 0.3  | 0     | -11.16    | 0.069                  | 0.633    | 17.5                     | -1.7      | 0.352                 | 0.927    | 1.5                      |
|      | 25    | 0.64      | 0.112                  | 0.93     | 15                       | 0.07      | 0.378                 | 0.955    | 1.5                      |
|      | 50    | 0.46      | 0.094                  | 0.946    | 9.6                      | 0.04      | 0.364                 | 0.953    | 1.3                      |
|      | 100   | 0.25      | 0.082                  | 0.947    | 7.1                      | 0.01      | 0.357                 | 0.951    | 1.3                      |
|      | 200   | 0.17      | 0.075                  | 0.948    | 5.9                      | 0         | 0.353                 | 0.951    | 1.2                      |
|      | 300   | 0.13      | 0.073                  | 0.949    | 5.4                      | -0.01     | 0.352                 | 0.952    | 1.2                      |
|      | 1000  | -0.03     | 0.047                  | 0.95     | 2.2                      | 0.01      | 0.235                 | 0.95     | 0.5                      |

Table 25: Simulation Results using Site-Specific and Combined-Site Parameter Estimates based on the First Audit when Predictor ( $X$ ) and Outcome ( $Y$ ) are Sometimes Incorrect

| $p$                       | $n_v$ | Site-Specific Parameter Estimates      |        |          |        | Across-Site Parameter Estimates        |       |          |      |
|---------------------------|-------|----------------------------------------|--------|----------|--------|----------------------------------------|-------|----------|------|
|                           |       | %-Bias                                 | SE     | Coverage | MSE    | %-Bias                                 | SE    | Coverage | MSE  |
| <i>Site A</i>             |       |                                        |        |          |        |                                        |       |          |      |
|                           |       | $\rho_{u,u^*} = 0, \sigma_u = 0.02$    |        |          |        | $\rho_{u,u^*} = -0.75, \sigma_u = 1.0$ |       |          |      |
| 0.07                      | 0     | -2.19                                  | 4.236  | 0.951    | 17.9   | 21.36                                  | 4.048 | 0.932    | 18.3 |
|                           | 25    | -2.19                                  | 4.21   | 0.949    | 17.9   | -15.11                                 | 4.417 | 0.932    | 26.8 |
|                           | 50    | -2.19                                  | 4.206  | 0.948    | 17.9   | -8.42                                  | 4.206 | 0.942    | 19.1 |
|                           | 75    | -2.19                                  | 4.204  | 0.948    | 17.9   | -5.04                                  | 4.15  | 0.945    | 18.2 |
|                           | 100   | -2.19                                  | 4.204  | 0.948    | 17.9   | -3.27                                  | 4.126 | 0.943    | 17.9 |
|                           | 260   | -2.2                                   | 4.236  | 0.951    | 17.9   | 1.58                                   | 4.037 | 0.947    | 16.9 |
| <i>Site B</i>             |       |                                        |        |          |        |                                        |       |          |      |
|                           |       | $\rho_{u,u^*} = 0, \sigma_u = 0.07$    |        |          |        | $\rho_{u,u^*} = -0.75, \sigma_u = 1.0$ |       |          |      |
| 0.18                      | 0     | 1.91                                   | 3.703  | 0.947    | 14.1   | 48.61                                  | 3.111 | 0.886    | 15.9 |
|                           | 25    | 1.96                                   | 3.677  | 0.941    | 14.2   | -25.61                                 | 4.148 | 0.946    | 24.7 |
|                           | 50    | 1.96                                   | 3.677  | 0.941    | 14.2   | -11.7                                  | 3.668 | 0.955    | 14.5 |
|                           | 75    | 1.96                                   | 3.677  | 0.942    | 14.2   | -7.29                                  | 3.503 | 0.958    | 12.2 |
|                           | 100   | 1.97                                   | 3.677  | 0.941    | 14.2   | -4.37                                  | 3.413 | 0.962    | 11.4 |
|                           | 439   | 1.93                                   | 3.704  | 0.947    | 14.2   | -0.43                                  | 3.093 | 0.959    | 9.4  |
| <i>Site C</i>             |       |                                        |        |          |        |                                        |       |          |      |
|                           |       | $\rho_{u,u^*} = -0.99, \sigma_u = 1.8$ |        |          |        | $\rho_{u,u^*} = -0.75, \sigma_u = 1.0$ |       |          |      |
| 0.26                      | 0     | 433.56                                 | 4.24   | 0.001    | 549.9  | 44.7                                   | 2.495 | 0.852    | 11.4 |
|                           | 25    | -266.83                                | 18.982 | 0.843    | 1163.6 | -23.03                                 | 3.535 | 0.95     | 20.4 |
|                           | 50    | -112.41                                | 13.563 | 0.908    | 343.5  | -9.09                                  | 3.065 | 0.957    | 10.4 |
|                           | 75    | -64.78                                 | 11.391 | 0.928    | 179    | -4.48                                  | 2.886 | 0.957    | 8.1  |
|                           | 100   | -46.52                                 | 10.203 | 0.939    | 124.9  | -2.96                                  | 2.807 | 0.968    | 7.4  |
|                           | 686   | -5.12                                  | 4.839  | 0.941    | 25.1   | 0.49                                   | 2.48  | 0.954    | 5.9  |
| <i>Site D</i>             |       |                                        |        |          |        |                                        |       |          |      |
|                           |       | $\rho_{u,u^*} = 0, \sigma_u = 0.1$     |        |          |        | $\rho_{u,u^*} = -0.75, \sigma_u = 1.0$ |       |          |      |
| 0.07                      | 0     | 0.82                                   | 2.667  | 0.931    | 7.9    | 20.14                                  | 3.577 | 0.933    | 14.7 |
|                           | 25    | 0.83                                   | 2.652  | 0.929    | 7.9    | -17.63                                 | 4.009 | 0.931    | 23.3 |
|                           | 50    | 0.83                                   | 2.651  | 0.928    | 7.9    | -9.62                                  | 3.776 | 0.932    | 16.3 |
|                           | 75    | 0.83                                   | 2.651  | 0.928    | 7.9    | -6.3                                   | 3.716 | 0.931    | 15.1 |
|                           | 100   | 0.83                                   | 2.651  | 0.928    | 7.9    | -4.12                                  | 3.685 | 0.937    | 14.5 |
|                           | 332   | 0.77                                   | 2.667  | 0.932    | 7.9    | 0.35                                   | 3.567 | 0.945    | 13.4 |
| <i>Site E</i>             |       |                                        |        |          |        |                                        |       |          |      |
|                           |       | $\rho_{u,u^*} = 0, \sigma_u = 0.23$    |        |          |        | $\rho_{u,u^*} = -0.75, \sigma_u = 1.0$ |       |          |      |
| 0.23                      | 0     | 14.85                                  | 3.338  | 0.944    | 11.5   | 21.48                                  | 3.294 | 0.934    | 12.6 |
|                           | 25    | -73.82                                 | 3.33   | 0.942    | 11.6   | -19.28                                 | 3.959 | 0.936    | 22.5 |
|                           | 50    | -55.87                                 | 3.324  | 0.94     | 11.6   | -9.28                                  | 3.624 | 0.941    | 14.3 |
|                           | 75    | -51.04                                 | 3.323  | 0.941    | 11.5   | -7.27                                  | 3.542 | 0.946    | 13.4 |
|                           | 100   | -48.29                                 | 3.322  | 0.941    | 11.6   | -6.16                                  | 3.496 | 0.94     | 12.8 |
|                           | 397   | -40.42                                 | 3.332  | 0.948    | 11.4   | -2.03                                  | 3.272 | 0.945    | 10.9 |
| <i>Site F<sup>a</sup></i> |       |                                        |        |          |        |                                        |       |          |      |
|                           |       | $\rho_{u,u^*} = 0, \sigma_u = 0$       |        |          |        | $\rho_{u,u^*} = -0.75, \sigma_u = 1.0$ |       |          |      |
| 0                         | 0     |                                        |        |          |        | 17.3                                   | 2.454 | 0.928    | 7.3  |
|                           | 25    |                                        |        |          |        | -12.61                                 | 2.873 | 0.923    | 13.3 |
|                           | 50    |                                        |        |          |        | -9.44                                  | 2.685 | 0.932    | 9.1  |
|                           | 75    |                                        |        |          |        | -6.69                                  | 2.606 | 0.934    | 8    |
|                           | 100   |                                        |        |          |        | -5.01                                  | 2.572 | 0.931    | 7.5  |
|                           | 703   |                                        |        |          |        | 0.5                                    | 2.448 | 0.941    | 6.3  |

<sup>a</sup> Site F had no errors in date of ART initiation, so no simulations were performed using its site-specific parameter estimates, and simulations using multi-site parameter estimates were based on  $p = 0.06$  corresponding to the upper level of the 80% confidence interval for the error rate.
